# Supplementary material for: C5-substituted pyrido[2,3-d]pyrimidin-7-ones as highly specific kinase inhibitors targeting the clinical resistance-related EGFRT790M mutant
Source: Royal Society of Chemistry journal article supplement (doi:10.1039/c5md00208g), 2015-01-01
Supplement: c5md00208g1.pdf [file c5md00208g1.pdf]

# Supporting Information

## Table of Contents

|                                                                              |     |
|------------------------------------------------------------------------------|-----|
| Synthesis of compounds <b>9</b> .....                                        | S2  |
| Enzyme-linked immunosorbent assay (ELISA) kinase assay .....                 | S25 |
| Kinase profiling study and $K_d$ determination. ....                         | S26 |
| Western blot analysis.....                                                   | S27 |
| Irreversibility assessments for compounds.....                               | S28 |
| Cell lines and proliferation assay .....                                     | S29 |
| $^1\text{H}$ NMR and $^{13}\text{C}$ NMR spectra of compounds <b>9</b> ..... | S31 |
| The Kinase Profiling Results of Compound <b>9f</b> .....                     | S51 |

## Synthesis of compounds 9

### General Methods for Chemistry

All reagents and solvents were purchased from suppliers without further purification. Analytical TLC was carried out on silica gel plates with fluorescence F254 and UV light visualization.  $^1\text{H}$  NMR spectra were recorded on a Bruker AV-400 spectrometer at 400 MHz.  $^{13}\text{C}$  NMR spectra were recorded on a Bruker AV-500 spectrometer at 125 MHz. Chemical shifts ( $\delta$ ) of NMR are reported in parts per million (ppm) units relative to residual undeuterated solvent, and coupling constants ( $J$  values) are given in hertz (Hz). Splitting patterns and apparent multiplicities are described as below: s (singlet), d (doublet), t (triplet), q (quartet), m (multiplet), br (broad signal), dd (doublet of doublets). High-resolution mass spectra (HRMS) were measured by an Applied Biosystems Q-STAR Elite ESI-LC-MS/MS mass spectrometer. Purity of the final compounds were determined with reverse-phase HPLC analysis to be over 95% (SI). HPLC instrument: Dionex Summit HPLC (Column: Diamonsil C18, 5.0  $\mu\text{m}$ , 4.6  $\times$  250 mm (Agilent Technologies); detector: PDA-100 photodiode array; injector: ASI-100 autoinjector; pump: p-680A). A flow rate of 1.0 mL/min was used with mobile phase of MeOH in  $\text{H}_2\text{O}$  with 0.1% modifier (ammonia, v/v).

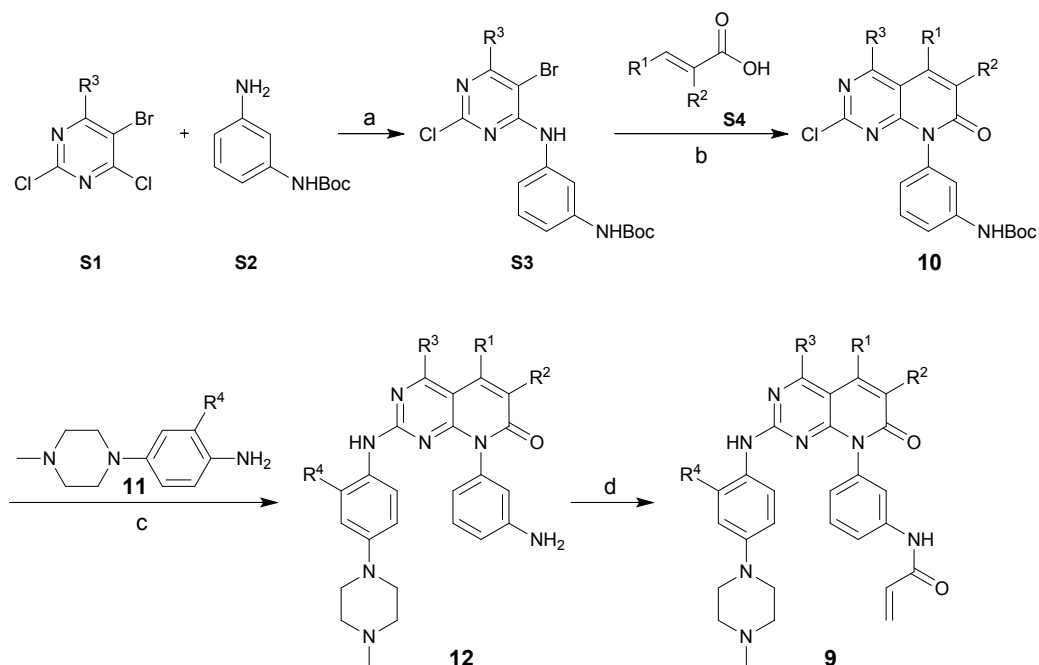

- a)  $R^1 = R^2 = R^3 = H$ ;  $R^4 = MeO$   
 b)  $R^1 = R^3 = H$ ;  $R^2 = Me$ ;  $R^4 = MeO$   
 f)  $R^1 = Me$ ;  $R^2 = R^3 = H$ ;  $R^4 = MeO$   
 g)  $R^1 = Et$ ;  $R^2 = R^3 = H$ ;  $R^4 = MeO$   
 h)  $R^1 = n\text{-Pr}$ ;  $R^2 = R^3 = H$ ;  $R^4 = MeO$

- o)  $R^1 = R^3 = Me$ ;  $R^2 = H$ ;  $R^4 = MeO$   
 p)  $R^1 = Me$ ;  $R^2 = R^3 = R^4 = H$   
 q)  $R^1 = R^4 = Me$ ;  $R^2 = R^3 = H$   
 r)  $R^1 = Me$ ;  $R^2 = R^3 = H$ ;  $R^4 = EtO$   
 s)  $R^1 = Me$ ;  $R^2 = R^3 = H$ ;  $R^4 = n\text{-PrO}$   
 t)  $R^1 = Me$ ;  $R^2 = R^3 = H$ ;  $R^4 = iso\text{-PrO}$

**Scheme S1.** Synthesis of Compounds **9**. Reagents and conditions: a)  $K_2CO_3$ , DMF, rt, 60–84.2%. b) i) Compounds **13**,  $Pd(PhCN)_2Cl_2$ ,  $(o\text{-MeC}_6\text{H}_4)_3P$ , DIPEA, THF, 70 °C, Ar; ii)  $Ac_2O$ , 80 °C, 20–30%; (two steps). c) i) Compounds **15**, TFA, 2-Butanol, 100 °C; ii) TFA, DCM, rt, 60-80% (two steps). d) acryloyl chloride, DIPEA, DCM, 0 °C, 55-70%.

*tert*-Butyl (3-((5-bromo-2-chloropyrimidin-4-yl)amino)phenyl)carbamate (**S3a**). To a solution of 5-bromo-2, 4-dichloropyrimidine (0.45 g, 2.0 mmol) and *tert*-butyl (3-aminophenyl)carbamate (0.42 g, 2.0 mmol) in DMF (3 mL),  $K_2CO_3$  (0.55 g, 4.0 mmol) was added. The suspension was stirred overnight. 20 mL of water was added to the reaction mixture and the precipitate was collected by filtration. The solid was washed with ether and dried to yield compound **S3a** (0.67 g, 84.2%).  $^1H$  NMR (400 MHz,  $DMSO-d_6$ )  $\delta$  8.29 (s, 1 H), 7.78 (s, 1 H), 7.45 (d, 1 H,  $J = 7.2$  Hz), 7.32-7.28 (m, 2 H), 7.03 (dd, 1 H,  $J = 1.2$ , 8.0 Hz), 6.56 (s, 1 H), 1.53 (s, 9 H).

*tert*-Butyl (3-(2-chloro-7-oxopyrido[2,3-*d*]pyrimidin-8(7*H*)-yl)phenyl)carbamate (**10a**). Compound **S3a** (2.57 g, 6.43 mmol) and acrylic acid (2.22 mL, 64.3 mmol) were mixed in THF (40 mL) and DIPEA (11.2 mL) under argon. The slurry was stirred, evacuated and refilled with argon before bis(benzonitrile)palladium(II) dichloride (0.12 g, 5%) and tri-*o*-tolylphosphine (96 mg, 5%) were added. The mixture was then heated and stirred at 70 °C for 24 hrs and then 1.5 mL of Ac<sub>2</sub>O was added. The reaction mixture was heated and stirred at 80 °C for an additional 24 hrs. The solvent was removed under reduced pressure and the residue was diluted with DCM. The organic layer was separated and washed with 1N HCl (100 mL) and brine, dried over anhydrous Na<sub>2</sub>SO<sub>4</sub>, concentrated and purified by silica gel chromatography to afford compound **10a** (0.71g, 30%). <sup>1</sup>H NMR (400 MHz, DMSO-*d*<sub>6</sub>) δ 9.61 (s, 1 H), 9.07 (s, 1 H), 8.13 (d, 1 H, *J* = 9.6 Hz), 7.50 (s, 1 H), 7.45-7.39 (m, 2 H), 6.92-6.89 (m, 1 H), 6.85 (d, 1 H, *J* = 9.6 Hz), 1.46 (s, 9 H).

8-(3-Aminophenyl)-2-((2-methoxy-4-(4-methylpiperazin-1-yl)phenyl)amino)pyrido[2,3-*d*]pyrimidin-7(8*H*)-one (**12a**). To a solution of compound **10a** (260.9 mg, 0.7 mmol) in 2-butanol (8 mL), 2-methoxy-4-(4-methylpiperazin-1-yl)aniline (162.6 mg, 0.7 mmol) and trifluoroacetic acid (56.0 μL, 0.7 mmol) were added in a sealed tube. The reaction was heated to 95 °C for 12 hrs. The reaction mixture was then allowed to cool to room temperature. The mixture was transferred to a round-bottom flask and then the solvent was removed under reduced pressure. The residue was dissolved in DCM (3.0 mL) and TFA (3.0 mL), and the resulting mixture was stirred at room temperature overnight. The solvent was removed under reduced pressure, and the residue was neutralized with saturated NaHCO<sub>3</sub> solution. The water layer was extracted with DCM. The organic layer was combined and washed with brine, dried over Na<sub>2</sub>SO<sub>4</sub>, filtered, concentrated, and purified by silica gel chromatography to afford **12a** as a yellow solid (250 mg, 78% for two steps). <sup>1</sup>H NMR (400 MHz, DMSO-*d*<sub>6</sub>) δ 8.71 (s, 1 H), 8.08 (s, 1 H), 7.87 (d, 1 H, *J* = 9.6 Hz), 7.44 (d, 1 H, *J* = 8.8 Hz), 7.18 (t, 1 H, *J* = 8.0 Hz),

6.70 (d, 1 H,  $J$  = 8.4 Hz), 6.55 (d, 1 H,  $J$  = 2.4 Hz), 6.41-6.36 (m, 3 H), 6.15 (br, 1 H), 5.25 (br, 2 H), 3.79 (s, 3 H), 3.06 (t, 4 H,  $J$  = 4.8 Hz), 2.45 (t, 4 H,  $J$  = 4.8 Hz), 2.23 (s, 3 H).

*N*-(3-(2-((2-methoxy-4-(4-methylpiperazin-1-yl)phenyl)amino)-7-oxopyrido[2,3-*d*]pyrimidin-8(7*H*)-yl)phenyl)acrylamide (**9a**). Acryloyl chloride (45.4  $\mu$ L, 0.55 mmol) was added dropwise to a mixture of **12a** (250 mg, 0.55 mmol) and DIPEA (96.1  $\mu$ L, 0.55 mmol) in dry DCM (10 mL) at 0 °C. The reaction mixture was stirred at 0 °C for 1.0 hr and concentrated under reduced pressure. The resulting crude product was purified by silica gel chromatography to afford **9a** as a yellow solid (182.9 mg, 65%). <sup>1</sup>H NMR (400 MHz, DMSO-*d*<sub>6</sub>)  $\delta$  10.36 (s, 1 H), 8.74 (s, 1 H), 8.15 (s, 1 H), 7.92-7.86 (m, 2 H), 7.60 (s, 1 H), 7.51 (t, 1 H,  $J$  = 8.0 Hz), 7.27 (d, 1 H,  $J$  = 8.8 Hz), 7.00 (d, 1 H,  $J$  = 8.0 Hz), 6.52 (s, 1 H), 6.47-6.41 (m, 2 H), 6.27-6.23 (s, 1 H), 6.03 (br, 1 H), 5.78-5.75 (m, 1 H), 3.77 (s, 3 H), 3.03 (m, 4 H), 2.43 (m, 4 H), 2.22 (s, 3 H). <sup>13</sup>C NMR (125 MHz, DMSO-*d*<sub>6</sub>)  $\delta$  163.2, 162.5, 158.7, 156.4, 139.9, 137.5, 136.9, 131.7, 129.4, 127.0, 123.9, 119.6, 118.8, 117.2, 106.2, 105.7, 99.6, 55.7, 54.5, 48.5, 45.7. HRMS (ESI) for C<sub>28</sub>H<sub>29</sub>N<sub>7</sub>O<sub>3</sub> [M + H]<sup>+</sup>, calcd: 512.2405, found: 512.2400.

*N*-(3-(2-((2-Methoxy-4-(4-methylpiperazin-1-yl)phenyl)amino)-6-methyl-7-oxopyrido[2,3-*d*]pyrimidin-8(7*H*)-yl)phenyl)acrylamide (**9b**). <sup>1</sup>H NMR (400 MHz, DMSO-*d*<sub>6</sub>)  $\delta$  10.34 (s, 1 H), 8.68 (s, 1 H), 8.01 (s, 1 H), 7.87 (d, 1 H,  $J$  = 8.0 Hz), 7.78 (s, 1 H), 7.60 (s, 1 H), 7.51 (t, 1 H,  $J$  = 8.0 Hz), 7.30 (d, 1 H,  $J$  = 8.8 Hz), 7.00 (d, 1 H,  $J$  = 8.0 Hz), 6.52 (s, 1 H), 6.43 (dd, 1 H,  $J$  = 10.0, 16.8 Hz), 6.27-6.23 (m, 1 H), 6.01 (br, 1 H), 5.77-5.75 (m, 1 H), 3.77 (s, 3 H), 3.02 (m, 4 H), 2.44 (m, 4 H), 2.23 (s, 3 H), 2.11 (s, 3 H). <sup>13</sup>C NMR (125 MHz, Acetic-*d*<sub>4</sub>)  $\delta$  166.2, 166.0, 157.7, 157.3, 157.0, 150.8, 146.8, 140.4, 138.2, 135.3, 132.0, 131.0, 129.1, 128.4, 125.8, 123.1, 121.7, 121.6, 109.5, 107.7, 101.8, 56.4, 54.0, 48.3, 43.7, 17.2. HRMS (ESI) for C<sub>29</sub>H<sub>32</sub>N<sub>7</sub>O<sub>3</sub> [M + H]<sup>+</sup>, calcd: 526.2561, found: 526.2564.

*N*-(3-(2-((2-Methoxy-4-(4-methylpiperazin-1-yl)phenyl)amino)-5-methyl-7-oxopyrido[2,3-*d*]pyrimidin-8(7*H*)-yl)phenyl)acrylamide (**9f**). <sup>1</sup>H NMR (400 MHz, DMSO-*d*<sub>6</sub>)  $\delta$  10.34 (s, 1 H), 8.80 (s, 1 H), 8.10 (s, 1 H), 7.88 (d, 1 H,  $J$  = 8.0 Hz), 7.56 (s, 1 H), 7.50 (t, 1 H,  $J$  = 8.0 Hz), 7.26 (d, 1 H,  $J$  = 8.8 Hz), 6.97 (d, 1 H,  $J$  = 7.6 Hz), 6.52 (s, 1 H), 6.43 (dd,

1 H,  $J = 10.0, 16.8$  Hz), 6.32 (s, 1 H), 6.27-6.23 (m, 1 H), 5.99 (br, 1 H), 5.78-5.75 (m, 1 H), 3.77 (s, 3 H), 3.02 (m, 4 H), 2.46-2.43 (m, 7 H), 2.22 (s, 3 H).  $^{13}\text{C}$  NMR (125 MHz, DMSO- $d_6$ )  $\delta$  163.2, 162.1, 156.5, 156.3, 146.9, 139.9, 137.0, 131.7, 129.4, 127.1, 124.0, 119.7, 118.7, 116.5, 106.2, 106.1, 99.6, 55.7, 54.6, 48.5, 45.7, 17.0. HRMS (ESI) for  $\text{C}_{29}\text{H}_{31}\text{N}_7\text{O}_3$   $[\text{M} + \text{H}]^+$ , calcd: 526.2561, found: 526.2558.

*N*-(3-(5-ethyl-2-((2-methoxy-4-(4-methylpiperazin-1-yl)phenyl)amino)-7-oxopyrido[2,3-*d*]pyrimidin-8(7*H*)-yl)phenyl)acrylamide (**9g**).  $^1\text{H}$  NMR (400 MHz, DMSO- $d_6$ )  $\delta$  10.34 (s, 1 H), 8.85 (s, 1 H), 8.09 (s, 1 H), 7.87 (d, 1 H,  $J = 7.2$  Hz), 7.57 (s, 1 H), 7.50 (t, 1 H,  $J = 8.0$  Hz), 7.26 (d, 1 H,  $J = 8.8$  Hz), 6.98 (d, 1 H,  $J = 8.0$  Hz), 6.52 (s, 1 H), 6.43 (dd, 1 H,  $J = 10.0$  Hz, 16.8 Hz), 6.30 (s, 1 H), 6.27-6.23 (m, 1 H), 6.00 (br, 1 H), 5.78-5.75 (m, 1 H), 3.77 (s, 3 H), 3.02 (m, 4 H), 2.88 (q, 2 H,  $J = 7.2$  Hz), 2.43 (m, 4 H), 2.22 (s, 3 H), 1.28 (t, 3 H,  $J = 7.2$  Hz).  $^{13}\text{C}$  NMR (125 MHz, DMSO- $d_6$ )  $\delta$  163.6, 162.7, 156.9, 165.5, 152.4, 140.3, 137.5, 132.1, 129.9, 127.5, 124.4, 120.1, 119.1, 115.0, 106.6, 105.7, 100.0, 56.1, 55.0, 49.0, 46.2, 23.4, 13.3. HRMS (ESI) for  $\text{C}_{30}\text{H}_{33}\text{N}_7\text{O}_3$   $[\text{M} + \text{H}]^+$ , calcd: 540.2718, found: 540.2714.

*N*-(3-(2-((2-Methoxy-4-(4-methylpiperazin-1-yl)phenyl)amino)-7-oxo-5-propylpyrido[2,3-*d*]pyrimidin-8(7*H*)-yl)phenyl)acrylamide (**9h**).  $^1\text{H}$  NMR (400 MHz, DMSO- $d_6$ )  $\delta$  10.34 (s, 1 H), 8.86 (s, 1 H), 8.09 (s, 1 H), 7.87 (d, 1 H,  $J = 7.6$  Hz), 7.57 (s, 1 H), 7.50 (t, 1 H,  $J = 8.0$  Hz), 7.25 (d, 1 H,  $J = 8.8$  Hz), 6.99-6.97 (m, 1 H), 6.51 (d, 1 H,  $J = 2.0$  Hz), 6.43 (dd, 1 H,  $J = 10.0, 16.8$  Hz), 6.29 (s, 1 H), 6.25 (dd, 1 H,  $J = 2.0, 17.2$  Hz), 5.99 (br, 1 H), 5.76 (dd, 1 H,  $J = 1.6, 10.0$  Hz), 3.77 (s, 3 H), 3.02 (m, 4 H), 2.81 (t, 2 H,  $J = 7.2$  Hz), 2.42 (t, 4 H,  $J = 4.8$  Hz), 2.21 (s, 3 H), 1.74-1.64 (m, 2 H), 1.01 (t, 3 H,  $J = 7.2$  Hz).  $^{13}\text{C}$  NMR (125 MHz, DMSO- $d_6$ )  $\delta$  168.4, 167.4, 161.7, 155.7, 145.1, 142.3, 136.9, 134.7, 132.3, 129.2, 124.9, 123.9, 120.7, 111.4, 110.5, 104.8, 60.9, 59.8, 53.8, 51.0, 37.0, 27.1, 18.9. HRMS (ESI) for  $\text{C}_{31}\text{H}_{35}\text{N}_7\text{O}_3$   $[\text{M} + \text{H}]^+$ , calcd: 554.2874, found: 554.2875.

*N*-(3-(2-((2-methoxy-4-(4-methylpiperazin-1-yl)phenyl)amino)-4,5-dimethyl-7-oxopyrido [2,3-*d*]pyrimidin-8(7*H*)-yl)phenyl)acrylamide (**9o**).  $^1\text{H}$  NMR (400 MHz, DMSO-

$d_6$ )  $\delta$  10.33 (s, 1 H), 7.91 (d, 1 H,  $J = 8.4$  Hz), 7.84 (s, 1 H), 7.52-7.48 (m, 2 H), 7.16 (d, 1 H,  $J = 7.2$  Hz), 6.92 (d, 1 H,  $J = 7.6$  Hz), 6.50 (s, 1 H), 6.42 (dd, 1 H,  $J = 10.0, 16.8$  Hz), 6.31 (s, 1 H), 6.27-6.22 (m, 1 H), 5.95 (br, 1 H), 5.77-5.74 (m, 1 H), 3.78 (s, 3 H), 3.00 (m, 4 H), 2.77 (s, 3 H), 2.62 (s, 3 H), 2.42 (m, 4 H), 2.22 (s, 3 H).  $^{13}\text{C}$  NMR (125 MHz, Acetic- $d_4$ )  $\delta$  169.0, 166.1, 165.1, 158.9, 156.9, 151.2, 150.7, 146.7, 140.5, 138.8, 132.0, 131.1, 129.1, 125.7, 123.0, 121.5, 121.4, 119.4, 109.5, 107.9, 101.6, 56.4, 54.0, 48.3, 43.7, 25.9, 25.0. HRMS (ESI) for  $\text{C}_{30}\text{H}_{34}\text{N}_7\text{O}_3$   $[\text{M} + \text{H}]^+$ , calcd: 540.2718, found: 540.2720.

*N*-(3-(5-Methyl-2-((4-(4-methylpiperazin-1-yl)phenyl)amino)-7-oxopyrido[2,3- $d$ ]pyrimidin-8(7H)-yl)phenyl)acrylamide (**9p**).  $^1\text{H}$  NMR (400 MHz, DMSO- $d_6$ )  $\delta$  10.37 (s, 1 H), 9.84 (s, 1 H), 8.82 (s, 1 H), 7.93-7.91 (m, 1 H), 7.57 (s, 1 H), 7.53 (t, 1 H,  $J = 8.0$  Hz), 7.18 (d, 2 H,  $J = 6.0$  Hz), 6.99 (d, 1 H,  $J = 8.4$  Hz), 6.54 (d, 2 H,  $J = 6.8$  Hz), 6.43 (dd, 1 H,  $J = 10.0, 16.8$  Hz), 6.30 (s, 1 H), 6.25 (dd, 1 H,  $J = 2.0, 16.8$  Hz), 5.76 (dd, 1 H,  $J = 1.6, 10.0$  Hz), 2.95-2.94 (m, 4 H), 2.46 (s, 3 H), 2.41 (t, 4 H,  $J = 4.8$  Hz), 2.20 (s, 3 H).  $^{13}\text{C}$  NMR (125 MHz, DMSO- $d_6$ )  $\delta$  163.5, 162.4, 158.5, 156.6, 147.2, 146.3, 140.1, 137.4, 131.8, 131.7, 129.8, 127.4, 124.2, 119.8, 118.9, 116.4, 115.4, 106.0, 54.7, 48.7, 45.9, 17.1. HRMS (ESI) for  $\text{C}_{28}\text{H}_{29}\text{N}_7\text{O}_2$   $[\text{M} + \text{H}]^+$ , calcd: 496.2456, found: 496.2456.

*N*-(3-(5-Methyl-2-((2-methyl-4-(4-methylpiperazin-1-yl)phenyl)amino)-7-oxopyrido[2,3- $d$ ]pyrimidin-8(7H)-yl)phenyl)acrylamide (**9q**).  $^1\text{H}$  NMR (400 MHz, DMSO- $d_6$ )  $\delta$  10.29 (s, 1 H), 8.83 (s, 1 H), 8.75 (s, 1 H), 7.73 (d, 1 H,  $J = 8.4$  Hz), 7.54 (s, 1 H), 7.41 (t, 1 H,  $J = 8.0$  Hz), 7.07 (s, 1 H), 6.91 (d,  $J = 6.4$  Hz, 1 H), 6.63 (s, 1 H), 6.45 (dd, 1 H,  $J = 10.0, 17.2$  Hz), 6.28-6.23 (m, 2 H), 5.77 (dd, 1 H,  $J = 2.0, 10.0$  Hz), 2.99 (m, 4 H), 2.43-2.40 (m, 7 H), 2.21 (s, 3 H), 2.08 (s, 3 H).  $^{13}\text{C}$  NMR (125 MHz, DMSO- $d_6$ )  $\delta$  163.4, 162.4, 156.7, 156.3, 147.0, 139.8, 136.9, 131.8, 129.2, 128.8, 127.2, 124.2, 119.8, 118.6, 117.1, 116.1, 112.7, 106.1, 54.63, 48.7, 45.8, 18.3, 17.0. HRMS (ESI) for  $\text{C}_{29}\text{H}_{31}\text{N}_7\text{O}_2$   $[\text{M} + \text{H}]^+$ , calcd: 510.2612, found: 510.2603.

*N*-(3-(2-((2-Ethoxy-4-(4-methylpiperazin-1-yl)phenyl)amino)-5-methyl-7-oxopyrido[2,3- $d$ ]pyrimidin-8(7H)-yl)phenyl)acrylamide (**9r**).  $^1\text{H}$  NMR (400 MHz, DMSO-

$d_6$ )  $\delta$  10.35 (s, 1 H), 8.80 (s, 1 H), 8.02 (s, 1 H), 7.89 (d, 1 H,  $J$  = 7.2 Hz), 7.57 (s, 1 H), 7.51 (t, 1 H,  $J$  = 8.0 Hz), 7.28 (d, 1 H,  $J$  = 8.8 Hz), 6.98 (d, 1 H,  $J$  = 8.4 Hz), 6.51 (d, 1 H,  $J$  = 2.4 Hz), 6.45 (dd, 1 H,  $J$  = 10.0, 16.8 Hz), 6.33 (s, 1 H), 6.25 (dd, 1 H,  $J$  = 2.0, 16.8 Hz), 5.99 (br, 1 H), 5.76 (dd, 1 H,  $J$  = 2.0, 10.0 Hz), 4.04 (q, 2 H,  $J$  = 6.8 Hz), 3.00 (m, 4 H), 2.46 (s, 3 H), 2.42 (t, 4 H,  $J$  = 4.8 Hz), 2.21 (s, 3 H), 1.32 (t, 3 H,  $J$  = 6.8 Hz).  $^{13}\text{C}$  NMR (125 MHz, DMSO- $d_6$ )  $\delta$  163.2, 162.1, 156.5, 156.3, 146.8, 139.9, 137.0, 131.7, 129.5, 127.1, 124.0, 120.0, 119.6, 118.7, 116.6, 106.2, 106.1, 100.4, 63.9, 54.6, 48.6, 45.8, 17.0, 16.6. HRMS (ESI) for  $\text{C}_{30}\text{H}_{33}\text{N}_7\text{O}_3$   $[\text{M} + \text{H}]^+$ , calcd: 540.27176, found: 540.27173.

*N*-(3-(5-Methyl-2-((4-(4-methylpiperazin-1-yl)-2-propoxyphenyl)amino)-7-oxopyrido[2,3-*d*]pyrimidin-8(7*H*)-yl)phenyl)acrylamide (**9s**).  $^1\text{H}$  NMR (400 MHz, DMSO- $d_6$ )  $\delta$  10.35 (s, 1 H), 8.80 (s, 1 H), 8.00 (s, 1 H), 7.88 (d, 1 H,  $J$  = 8.0 Hz), 7.57 (s, 1 H), 7.51 (t, 1 H,  $J$  = 8.0 Hz), 7.27 (d, 1 H,  $J$  = 8.8 Hz), 6.98 (d, 1 H,  $J$  = 7.2 Hz), 6.51 (d, 1 H,  $J$  = 2.4 Hz), 6.43 (dd, 1 H,  $J$  = 10.0, 16.8 Hz), 6.33 (s, 1 H), 6.25 (dd, 1 H,  $J$  = 2.0, 17.2 Hz), 5.99 (br, 1 H), 5.76 (dd, 1 H,  $J$  = 2.0, 10.4 Hz), 3.94 (t, 1 H,  $J$  = 6.4 Hz), 3.00 (m, 4 H), 2.46 (s, 3 H), 2.42 (t, 4 H,  $J$  = 4.8 Hz), 2.22 (s, 3 H), 1.75-1.70 (m, 2 H), 0.95 (t, 3 H,  $J$  = 7.2 Hz).  $^{13}\text{C}$  NMR (125 MHz, DMSO- $d_6$ )  $\delta$  163.2, 162.1, 156.5, 156.3, 146.8, 139.9, 137.0, 131.7, 129.4, 127.0, 124.0, 120.0, 119.6, 118.7, 116.6, 106.3, 106.1, 100.5, 69.7, 54.6, 48.6, 45.8, 22.0, 17.0, 10.4. HRMS (ESI) for  $\text{C}_{31}\text{H}_{35}\text{N}_7\text{O}_3$   $[\text{M} + \text{H}]^+$ , calcd: 554.28741, found: 554.28711.

*N*-(3-(2-((2-Isopropoxy-4-(4-methylpiperazin-1-yl)phenyl)amino)-5-methyl-7-oxopyrido[2,3-*d*]pyrimidin-8(7*H*)-yl)phenyl)acrylamide (**9t**).  $^1\text{H}$  NMR (400 MHz, DMSO- $d_6$ )  $\delta$  10.36 (s, 1 H), 8.80 (s, 1 H), 7.93-7.90 (m, 2 H), 7.58 (s, 1 H), 7.52 (t, 1 H,  $J$  = 8.0 Hz), 7.31 (d, 1 H,  $J$  = 9.2 Hz), 6.99 (d, 1 H,  $J$  = 8.4 Hz), 6.54 (d, 1 H,  $J$  = 2.4 Hz), 6.43 (dd, 1 H,  $J$  = 10.0, 16.8 Hz), 6.34 (d, 1 H,  $J$  = 1.2 Hz), 6.25 (dd, 1 H,  $J$  = 2.0, 16.8 Hz), 5.99 (br, 1 H), 5.76 (dd, 1 H,  $J$  = 2.0, 10.0 Hz), 4.66-4.60 (m, 1 H), 2.99-2.98 (m, 4 H), 2.46 (s, 3 H), 2.42 (t, 4 H,  $J$  = 4.8 Hz), 2.21 (s, 3 H), 1.25 (d, 6 H,  $J$  = 6.0 Hz).  $^{13}\text{C}$  NMR (125 MHz, DMSO- $d_6$ )  $\delta$  163.2, 162.0, 156.5, 156.3, 146.8, 139.9, 137.1, 131.7, 129.5, 127.1, 124.0, 121.0, 119.7,



118.7, 116.6, 106.6, 106.1, 102.1, 70.7, 54.6, 48.6, 45.8, 21.8, 17.0. HRMS (ESI) for  $C_{31}H_{35}N_7O_3$   $[M + H]^+$ , calcd: 554.2874, found: 554.2874.

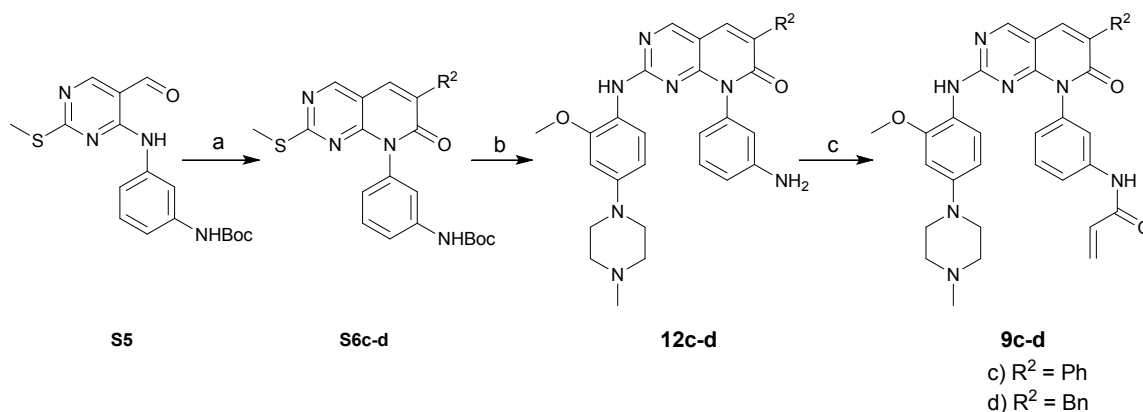

**Scheme S2.** Synthesis of Compounds **9c-d**. Reagents and conditions: a)  $R^2CH_2COOEt$  (**18**), LHMDS (1M in THF), THF,  $-78^\circ C$  to rt, 36-40%. b) 1) m-CPBA, DCM,  $0^\circ C$  to rt; 2) 2-methoxy-4-(4-methylpiperazin-1-yl)aniline, TFA, 2-Butanol,  $110^\circ C$ ; 3) TFA, DCM, rt, 30-40%. c) acryloyl chloride, DIPEA, DCM,  $0^\circ C$ , 58-75%.

*N*-(3-(2-((2-Methoxy-4-(4-methylpiperazin-1-yl)phenyl)amino)-7-oxo-6-phenylpyrido[2,3-*d*]pyrimidin-8(7*H*)-yl)phenyl)acrylamide (**9c**).  $^1H$  NMR (400 MHz, DMSO- $d_6$ )  $\delta$  10.38 (s, 1 H), 8.82 (s, 1 H), 8.21 (s, 1 H), 8.13 (s, 1 H), 7.90 (d, 1 H,  $J = 7.2$  Hz), 7.71 (d, 1 H,  $J = 7.6$  Hz), 7.66 (s, 1 H), 7.53 (t, 1 H,  $J = 8.0$  Hz), 7.43 (t, 1 H,  $J = 8.0$  Hz), 7.36 (t, 1 H,  $J = 7.2$  Hz), 7.33 (d, 1 H,  $J = 8.8$  Hz), 7.08 (d, 1 H,  $J = 7.6$  Hz), 6.53 (d, 1 H,  $J = 2.0$  Hz), 6.49 (dd, 1 H,  $J = 10.0, 16.8$  Hz), 6.28 (dd, 1 H,  $J = 2.0, 16.8$  Hz), 6.04 (br, 1 H), 5.78 (dd, 1 H,  $J = 2.0, 10.0$  Hz), 3.78 (s, 3 H), 3.06 (m, 4 H), 2.29 (m, 4 H).  $^{13}C$  NMR (125 MHz, DMSO- $d_6$ )  $\delta$  163.3, 161.7, 158.9, 155.7, 140.0, 137.3, 136.1, 135.1, 131.8, 129.5, 128.6, 128.0, 127.7, 127.4, 127.1, 124.0, 120.0, 119.7, 118.8, 106.3, 106.1, 99.8, 55.7, 53.9, 47.8, 44.7. HRMS (ESI) for  $C_{34}H_{34}N_7O_3$   $[M + H]^+$ , calcd: 588.2718, found: 588.2717.

*tert*-Butyl (3-(6-benzyl-2-(methylthio)-7-oxopyrido[2,3-*d*]pyrimidin-8(7*H*)-yl)phenyl)carbamate (**S6d**). LHMDS (1.0 M in THF, 6 mL, 6.0 mmol) was added into dry THF (5 mL) under argon protection, and then the mixture was stirred at  $-78^\circ C$ . Ethyl 3-phenylpropanoate (1.06 mL, 6.0 mmol) was then slowly added to the mixture and stirred for 20 min. Compound **S5** (720.0 mg, 2.0 mmol) dissolved in dry THF (5 mL) was

added to the mixture and stirred for another 1.0 hr at -78 °C. The reaction mixture slowly warmed to room temperature, stirred overnight. The reaction was quenched with saturated NH<sub>4</sub>Cl solution and was extracted with DCM. The organic layer was washed with brine and dried over Na<sub>2</sub>SO<sub>4</sub>, filtered, concentrated to afford the crude product. The crude product was recrystallized from ethyl acetate to give a light yellow product **S6d** (347 mg, 36.6%). <sup>1</sup>H NMR (400 MHz, DMSO-*d*<sub>6</sub>) δ 9.55 (s, 1 H), 8.87 (s, 1 H), 7.72 (s, 1 H), 7.46 (s, 1 H), 7.44-7.37 (m, 2 H), 7.35-7.32 (m, 4 H), 7.27-7.22 (m, 1 H), 6.89 (d, 1 H, *J* = 7.2 Hz), 3.86 (s, 2 H), 2.19 (s, 3 H), 1.45 (s, 9 H).

8-(3-Aminophenyl)-6-benzyl-2-((2-methoxy-4-(4-methylpiperazin-1-yl)phenyl)amino)pyrido [2,3-*d*] pyrimidin-7(8H)-one (**12d**) To a solution of compound **S6d** (118.6 mg, 0.25 mmol) in DCM (5 mL), 75% m-CPBA (172.6 mg, 0.75 mmol) was added dropwise at 0 °C. The mixture was slowly warmed to room temperature and stirred for 4.5 hrs. Subsequently, the reaction mixture was quenched with a saturated solution of Na<sub>2</sub>S<sub>2</sub>O<sub>3</sub>. The organic layer was separated and washed with saturated aqueous NaHCO<sub>3</sub> solution (three times), and brine. The combined organic layer was dried over Na<sub>2</sub>SO<sub>4</sub>, filtered, and concentrated under reduced pressure to give tert-butyl (3-(6-benzyl-2-(methylsulfonyl)-7-oxopyrido[2,3-*d*]pyrimidin-8(7H)-yl)phenyl)carbamate as a crude product which was used in the next step without further purification.

To a solution of the crude product in 2-butanol (5.0 mL), 2-methoxy-4-(4-methylpiperazin-1-yl)aniline (55.3 mg, 0.25 mmol) and trifluoroacetic acid (19.5 μL, 0.25 mmol) were added in a sealed tube. The reaction was heated to 110 °C for 24 hrs. The reaction mixture was allowed to cool to room temperature. The mixture was transferred to a round-bottom flask and then the solvent was removed under reduced pressure to afford the crude product. The crude product was then dissolved in DCM (2 mL) and TFA (2 mL), and the resulting mixture was stirred at room temperature overnight. The solvent was removed under reduced pressure, and the residue was neutralized by saturated NaHCO<sub>3</sub> solution. The water layer was extracted with DCM. The

organic layer was washed with brine and dried over Na<sub>2</sub>SO<sub>4</sub>, filtered, concentrated, and purified by silica gel chromatography to afford **12d** as a solid (47.9 mg, total yield of three steps 35.0 %). <sup>1</sup>H NMR (400 MHz, DMSO) δ 8.65 (s, 1 H), 8.00 (s, 1 H), 7.61 (s, 1 H), 7.44 (d, 1 H, *J* = 8.0 Hz), 7.34-7.30 (m, 4 H), 7.24-7.21 (m, 1 H), 7.17 (t, 1 H, *J* = 8.0 Hz), 6.70 (d, 1H, *J* = 8.0 Hz), 6.54 (d, 1 H, *J* = 2.4 Hz), 6.39-6.36 (m, 2 H), 6.15 (br, 1 H), 5.24 (s, 2 H), 3.81 (s, 2 H), 3.78 (s, 3 H), 3.05 (t, 4 H, *J* = 4.8 Hz), 2.45 (t, 4 H, *J* = 4.8 Hz), 2.22(s, 3 H).

*N*-(3-(6-Benzyl-2-((2-methoxy-4-(4-methylpiperazin-1-yl)phenyl)amino)-7-oxopyrido[2,3-*d*]pyrimidin-8(7*H*)-yl)phenyl)acrylamide (**9d**). The synthetic procedure of **9d** from **12d** was similar to that of **9a**. <sup>1</sup>H NMR (400 MHz, DMSO-*d*<sub>6</sub>) δ 10.33 (s, 1 H), 8.69 (s, 1 H), 8.06 (s, 1 H), 7.86 (d, 1 H, *J* = 6.8 Hz), 7.65 (s, 1 H), 7.58 (s, 1 H), 7.51 (t, 1 H, *J* = 8.0 Hz), 7.33-7.23 (m, 6 H), 7.00 (d, 1 H, *J* = 7.2 Hz), 6.51 (s, 1 H), 6.43 (dd, 1 H, *J* = 9.6, 16.8 Hz), 6.26-6.22 (m, 1 H), 6.02 (brs, 1 H), 5.77-5.75 (m, 1 H), 3.83 (s, 2 H), 3.76 (s, 3 H), 3.02 (m, 4 H), 2.42 (m, 4 H), 2.22(s, 3 H). <sup>13</sup>C NMR (125 MHz, DMSO-*d*<sub>6</sub>) δ 163.2, 162.5, 158.1, 155.5, 139.9, 139.3, 137.2, 133.9, 131.7, 129.4, 128.8, 128.4, 127.1, 126.2, 124.0, 119.8, 119.5, 118.8, 106.2, 105.6, 99.6, 55.7, 54.6, 48.6, 45.7, 35.7. HRMS (ESI) for C<sub>35</sub>H<sub>36</sub>N<sub>7</sub>O<sub>3</sub> [M + H]<sup>+</sup>, calcd: 602.2874, found: 602.2876.

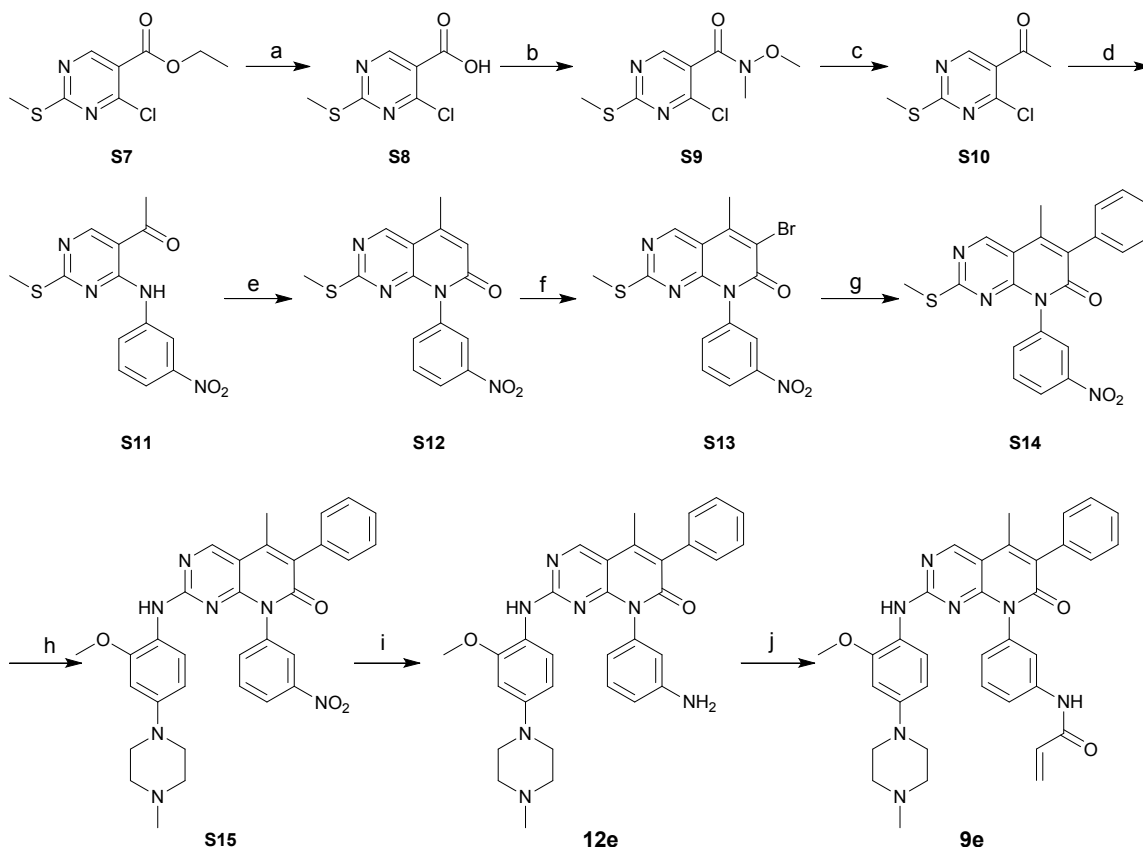

**Scheme S3.** Synthesis of Compounds **9e**. Reagents and conditions: a) LiOH·H<sub>2</sub>O, THF:H<sub>2</sub>O (1:1, v:v), 60 °C, 85%. b) *N*, *O*-dimethylhydroxylamine hydrochloride, DMTMM, CH<sub>3</sub>CN, rt, 60.6%. c) Methylmagnesium bromide (1M in THF), THF, -78 °C to -10 °C, 49.3%. d) 3-nitroaniline, DIPEA, CH<sub>3</sub>CN, 50 °C, 32.8%. e) Ph<sub>3</sub>PCHCOOMe, toluene, 110 °C, Ar, 78%. f) Br<sub>2</sub>, DCM, 0 °C to rt, 58.9%. g) Phenylboronic acid, Pd(dppf)<sub>2</sub>DCM·Cl<sub>2</sub>, Et<sub>3</sub>N, DME:H<sub>2</sub>O (10:1, v:v), rt, 83%. h) 1) *m*-CPBA, DCM, 0 °C to rt, ii) 2-methoxy-4-(4-methylpiperazin-1-yl)aniline, TFA, 2-Butanol, 110 °C, 63.2% (two steps). i) Pd/C, H<sub>2</sub> (1 atm), AcOH, rt, 46.3%. j) acryloyl chloride, DIPEA, DCM, 0 °C, 74.5%.

4-Chloro-2-(methylthio)pyrimidine-5-carboxylic acid (**S8**). LiOH·H<sub>2</sub>O (2.52 g, 60 mmol) was slowly added into a mixed solution of ethyl 4-chloro-2-(methylthio)pyrimidine-5-carboxylate (11.64 g, 50.0 mmol) in THF (50 mL and H<sub>2</sub>O (50 mL), then the mixture was heated and stirred at 60 °C overnight. The solution was acidified with 1M HCl after THF was partly removed under reduced pressure. The mixture was extracted with ethyl acetate. The organic layer was washed with brine and dried over Na<sub>2</sub>SO<sub>4</sub>, filtered,

concentrated to give **S8** as a white solid (8.70 g, 85%).  $^1\text{H}$  NMR (400 MHz,  $\text{DMSO}-d_6$ )  $\delta$  8.99 (s, 1 H), 2.58 (s, 3 H).

4-Chloro-*N*-methoxy-*N*-methyl-2-(methylthio)pyrimidine-5-carboxamide (**S9**). To a mixture of compound **S8** (204.6 mg, 1 mmol), DMTMM (276.7 mg, 1 mmol) and *N*, *O*-dimethylhydroxylamine hydrochloride (97.5 mg, 1 mmol) in acetonitrile (5 mL) was slowly added DIPEA (0.17 mL, 1 mmol). The reaction mixture was stirred at room temperature for 1 h and then the solvent was removed under reduced pressure. DCM was added to dissolve the crude product, and then the organic layer was washed with water, brine once and dried over  $\text{Na}_2\text{SO}_4$ , filtered, concentrated, and purified by silica gel chromatography to afford **S9** as a white solid (150.0 mg, 60.6%).  $^1\text{H}$  NMR (400 MHz,  $\text{CDCl}_3$ )  $\delta$  8.43 (s, 1 H), 3.55 (s, 3 H), 3.37 (s, 3 H), 2.59 (s, 3 H).

1-(4-Chloro-2-(methylthio)pyrimidin-5-yl)ethanone (**S10**). Methylmagnesium bromide (1M in THF, 2.00 mL, 2.0 mmol) was slowly added to a solution of compound **S9** (495.4 mg, 2.0 mmol) in dry THF (5 mL) under Ar condition at  $-78^\circ\text{C}$ . The resulting mixture was slowly warmed to  $-10^\circ\text{C}$ , and then stirred for 1 h. The reaction was quenched with 1N HCl (2 mL) and then partitioned between water and DCM. The organic layer was washed with brine and dried over  $\text{Na}_2\text{SO}_4$ , filtered, concentrated, and purified by silica gel chromatography to afford **S10** (200.0 mg, 49.3%).  $^1\text{H}$  NMR (400 MHz,  $\text{CDCl}_3$ )  $\delta$  8.76 (s, 1 H), 2.69 (s, 3 H), 2.61 (s, 3 H).

1-(2-(Methylthio)-4-((3-nitrophenyl)amino)pyrimidin-5-yl)ethanone (**S11**). To a solution of 1-(4-chloro-2-(methylthio)pyrimidin-5-yl)ethanone (202.7 mg, 1.0 mmol) and 3-nitroaniline (138.1 mg, 1.0 mmol) in 5 mL of acetonitrile was added DIPEA (0.17 mL, 1 mmol). The suspension was stirred at  $50^\circ\text{C}$  overnight. The reaction mixture was allowed to cool to room temperature. The precipitate was filtered to give **S11** as a light yellow solid (100.0 mg, 32.8%).  $^1\text{H}$  NMR (400 MHz,  $\text{DMSO}-d_6$ )  $\delta$  11.46 (s, 1 H), 9.00-8.99 (m, 2 H), 7.99 (d, 1 H,  $J = 8.4$  Hz), 7.91 (d, 1 H,  $J = 8.0$  Hz), 7.66 (t, 1 H,  $J = 8.0$  Hz), 2.64 (s, 3 H), 2.58 (s, 3 H).

5-Methyl-2-(methylthio)-8-(3-nitrophenyl)pyrido[2,3-*d*]pyrimidin-7(8*H*)-one (**S12**). A mixture of compound **S11** (918.0 mg, 3.0 mmol) and methyl (triphenylphosphoranylidene)acetate (1.21 g, 3.6 mmol) in dry toluene (10 mL) was heated to reflux under argon for 48 hrs and then the solvent was removed under reduced pressure. The resulting crude product was purified by silica gel chromatography to afford compound **S12** (776.0 mg, 78.0%). <sup>1</sup>H NMR (400 MHz, DMSO-*d*<sub>6</sub>) δ 9.00 (s, 1 H), 8.37-8.34 (m, 2 H), 7.88-7.82 (m, 2 H), 6.62 (d, 1 H, *J* = 1.2 Hz), 2.52 (s, 3 H), 2.15 (s, 3 H).

6-Bromo-5-methyl-2-(methylthio)-8-(3-nitrophenyl)pyrido[2,3-*d*]pyrimidin-7(8*H*)-one (**S13**). Bromine (0.12 mL, 2.36 mmol) was slowly added dropwise to a solution of compound **S12** (776.0 mg, 2.36 mmol) at 0 °C under argon. The reaction mixture was stirred overnight at room temperature. Subsequently, the reaction mixture was quenched with a saturated solution of Na<sub>2</sub>S<sub>2</sub>O<sub>3</sub>. The organic layer was separated and washed with water, then brine. The combined organic layer was dried over Na<sub>2</sub>SO<sub>4</sub>, filtered, concentrated and purified by silica gel chromatography to afford **S13** as a white solid (567.0 mg, 58.9%). <sup>1</sup>H NMR (400 MHz, DMSO-*d*<sub>6</sub>) δ 9.15 (s, 1 H), 8.41-8.36 (m, 2 H), 7.91-7.84 (m, 2 H), 2.72 (s, 3 H), 2.14 (s, 3 H).

5-Methyl-2-(methylthio)-8-(3-nitrophenyl)-6-phenylpyrido[2,3-*d*]pyrimidin-7(8*H*)-one (**S14**). Compound **S13** (407.2mg, 1mmol), phenylboronic acid (182.9mg, 1.5mmol), Pd(dppf)<sub>2</sub>DCM·Cl<sub>2</sub> (81.6mg, 0.1 mmol) and Et<sub>3</sub>N (0.42mL, 3.0 mmol) were added to a mixture solution of DME (8 mL) and H<sub>2</sub>O (0.8 mL). The mixture was evacuated and refilled with argon and then heated to 90 °C, stirred for 24 hrs. The mixture was diluted with DCM and partitioned between water and DCM. The organic layer was washed with brine and dried over Na<sub>2</sub>SO<sub>4</sub>, filtered, concentrated, and purified by silica gel chromatography to afford **S14** as a white solid (337.0 mg, 83.0%). <sup>1</sup>H NMR (400 MHz, DMSO-*d*<sub>6</sub>) δ 9.10 (s, 1 H), 8.40 (t, 1 H, *J* = 2.0 Hz), 8.37-8.34 (m, 1 H), 7.93-7.91 (m, 1H), 7.85 (t, 1 H, *J* = 8.0 Hz), 7.46 (t, 2 H, *J* = 7.2 Hz), 7.40 (t, 1 H, *J* = 7.6 Hz), 7.33-7.31 (m, 2 H), 2.36 (s, 3 H), 2.18 (s, 3 H).

2-((2-Methoxy-4-(4-methylpiperazin-1-yl)phenyl)amino)-5-methyl-8-(3-nitrophenyl)-6-phenylpyrido[2,3-*d*]pyrimidin-7(8*H*)-one (**S15**). To a solution of compound **S14** (337.0 mg, 0.83 mmol) in DCM (10mL), 75% m-CPBA(507.0 mg, 2.52 mmol) was added dropwise at 0 °C. The mixture was slowly warmed to room temperature and stirred for 4 hrs. Subsequently, the reaction mixture was quenched with a saturated solution of Na<sub>2</sub>S<sub>2</sub>O<sub>3</sub>. The organic layer was separated and washed with saturated aqueous NaHCO<sub>3</sub> solution (three times), then brine. The combined organic layer was dried over Na<sub>2</sub>SO<sub>4</sub>, filtered, and concentrated under reduced pressure to give 5-methyl-2-(methylsulfonyl)-8-(3-nitrophenyl)-6-phenylpyrido[2,3-*d*]pyrimidin-7(8*H*)-one as a crude product which was used in the next step without further purification.

To a solution of the crude product in 2-butanol (8 mL), 2-methoxy-4-(4-methylpiperazin-1-yl)aniline (183.3 mg, 0.83 mmol) and TFA (66.5 µL, 0.83 mmol) were added in a sealed tube (25 mL). The mixture was heated to 110 °C, and then stirred for 24 hrs. The mixture was allowed to cool to room temperature and was transferred to a round-bottom flask. The solvent was removed under reduced pressure and the resulting crude product was dissolved in DCM, and then washed with saturated aqueous NaHCO<sub>3</sub> solution and brine. The combined organic layer was dried over Na<sub>2</sub>SO<sub>4</sub>, filtered, concentrated and purified by silica gel chromatography to give **S15** as a yellow solid (303.0 mg, 63.2%). <sup>1</sup>H NMR (400 MHz, DMSO-*d*<sub>6</sub>) δ 8.90 (s, 1 H), 8.37-8.32 (m, 3 H), 7.87-7.81 (m, 2 H), 7.44 (t, 2 H, *J* = 7.2 Hz), 7.38-7.34 (m, 1 H), 7.31-7.29 (m, 2 H), 7.05 (br, 1H), 6.49 (s, 1 H), 5.99 (br, 1 H), 3.74 (s, 3 H), 3.04 (m, 4 H), 2.45 (t, 4 H, *J* = 4.4 Hz), 2.31 (s, 3 H), 2.23 (s, 3 H).

8-(3-Aminophenyl)-2-((2-methoxy-4-(4-methylpiperazin-1-yl)phenyl)amino)-5-methyl-6-phenylpyrido[2,3-*d*]pyrimidin-7(8*H*)-one (**12e**). A suspension of compound **S15** (303.0 mg, 0.52 mmol) and Pd/C (20 mg) in glacial acetic acid (10 mL) at room temperature was stirred under 1 atm H<sub>2</sub> for 6 hrs. The suspension was then filtered through Dicalite, and the filtrate was collected, concentrated under reduced pressure.

The resulting residue was neutralized by saturated NaHCO<sub>3</sub> solution. The water layer was extracted with DCM. The organic layer was washed with brine and dried over Na<sub>2</sub>SO<sub>4</sub>, filtered and concentrated to give compound **12e** as a yellow solid (241.0 mg, 46.3%). <sup>1</sup>H NMR (400 MHz, DMSO-*d*<sub>6</sub>) δ 8.86 (s, 1 H), 8.04 (s, 1 H), 7.49-7.41 (m, 3 H), 7.35 (t, 1 H, *J* = 7.6 Hz), 7.37-7.34 (m, 2 H), 7.18 (t, 1 H, *J* = 8.0 Hz), 6.70 (d, 1 H, *J* = 8.0 Hz), 6.56 (d, 1 H, *J* = 2.4 Hz), 6.44-6.43 (m, 1 H), 6.41-6.39 (m, 1 H), 6.15 (br s, 1 H), 5.25 (s, 2 H), 3.81 (s, 3 H), 3.06-3.05 (m, 4 H), 2.45 (t, 4 H, *J* = 4.8 Hz), 2.27 (s, 3 H), 2.23 (s, 3 H).

*N*-(3-(2-((2-Methoxy-4-(4-methylpiperazin-1-yl)phenyl)amino)-5-methyl-7-oxo-6-phenylpyrido[2,3-*d*]pyrimidin-8(7*H*)-yl)phenyl)acrylamide (**9e**). The synthetic procedure of **9e** is similar to that of **9a**. <sup>1</sup>H NMR (400 MHz, DMSO-*d*<sub>6</sub>) δ 10.34 (s, 1 H), 8.89 (s, 1 H), 8.10 (s, 1 H), 7.86 (d, 1 H, *J* = 8.0 Hz), 7.64 (s, 1 H), 7.51 (t, 1 H, *J* = 8.0 Hz), 7.44 (t, 1 H, *J* = 7.2 Hz), 7.38-7.34 (m, 1 H), 7.31-7.29 (m, 3 H), 7.03 (d, 1 H, *J* = 8.0 Hz), 6.53 (s, 1 H), 6.43 (dd, 1 H, *J* = 10.0, 17.2 Hz), 6.27-6.23 (m, 1 H), 6.02 (br, 1 H), 5.78-5.75 (m, 1 H), 3.79 (s, 3 H), 3.03 (m, 4 H), 2.45-2.44 (m, 4 H), 2.30 (s, 3 H), 2.23 (s, 3 H). <sup>13</sup>C NMR (125 MHz, DMSO-*d*<sub>6</sub>) δ 163.6, 162.2, 157.4, 155.8, 142.7, 140.3, 137.8, 135.9, 132.2, 130.9, 129.9, 127.8, 127.5, 124.5, 120.3, 120.1, 119.1, 106.7, 106.7, 100.0, 56.1, 55.0, 49.0, 46.2, 15.7. HRMS (ESI) for C<sub>35</sub>H<sub>35</sub>N<sub>7</sub>O<sub>3</sub> [M + H]<sup>+</sup>, calcd: 602.2874, found: 602.2873.



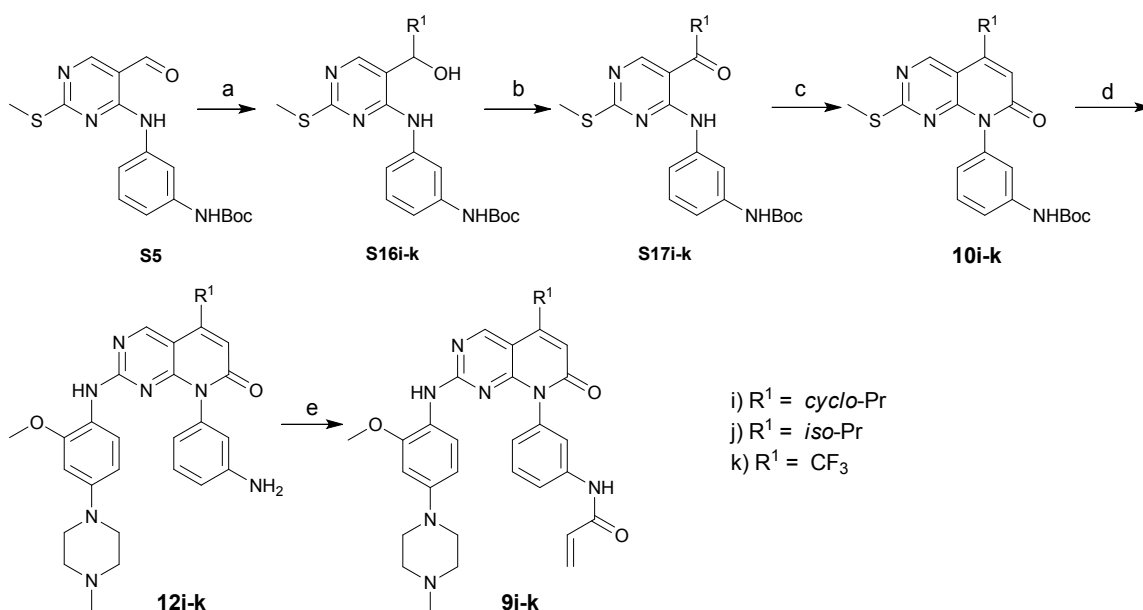

**Scheme S4.** Synthesis of **9i-k**. Reagents and conditions: a) R<sup>1</sup>MgBr (in THF), THF, -78 °C, Ar, 57.8-60% or CF<sub>3</sub>TMS, THF, 0 °C to rt, Ar, 27%. b) MnO<sub>2</sub>, DCM, reflux, 80-86.6%. c) Ph<sub>3</sub>PCHCOOMe, toluene, 110 °C, 40-50%. d) 1) m-CPBA, DCM, 0 °C to rt; 2) 2-methoxy-4-(4-methylpiperazin-1-yl)aniline, TFA, 2-Butanol, 110 °C; 3) TFA, DCM, rt, 30-40%. e) acryloyl chloride, DIPEA, DCM, 0 °C, 70-75%.

tert-Butyl (3-((5-(cyclopropyl(hydroxy)methyl)-2-(methylthio)pyrimidin-4-yl)amino)phenyl)carbamate (**S16i**). Compound **S5** (1.44 g, 4 mmol) was dissolved in dry THF (10 mL) under Ar then cooled to -78 °C, to which cyclopropylmagnesium bromide (20 mL, 10 mmol, 0.5M in THF) was slowly added and stirred for 4h. The reaction was quenched with 1N HCl (10 mL) and then partitioned between water and DCM. The organic layer was washed with brine and dried over Na<sub>2</sub>SO<sub>4</sub>, filtered, concentrated, and purified by silica gel chromatography to afford **S16i** (0.93 g, 57.8%). <sup>1</sup>H NMR (400 MHz, DMSO-*d*<sub>6</sub>) δ 9.36 (s, 1H), 8.93 (s, 1 H), 8.11 (s, 1 H), 7.80 (s, 1 H), 7.35 (d, 1H, *J* = 8.0 Hz), 7.19 (t, 1 H, *J* = 8.0 Hz), 7.01 (d, 1 H, *J* = 8.0 Hz), 6.04 (d, 1 H, *J* = 3.2 Hz), 4.11-4.09 (m, 1 H), 2.45 (s, 3 H), 1.47 (s, 9 H), 0.60-0.55 (m, 1H), 0.47-0.42 (m, 1 H), 0.32-0.31 (m, 1 H).

tert-Butyl (3-((2-(methylthio)-5-(2,2,2-trifluoro-1-hydroxyethyl)pyrimidin-4-yl)amino)phenyl)carbamate (**S16k**). To a mixture of compound **S5** (1.8 g, 5 mmol) and CsF (10 mg) in dry THF (25 mL) was added CF<sub>3</sub>TMS (2.95 mL, 20 mmol) under Ar. The

reaction mixture was then stirred at room temperature for 48 h. The reaction was quenched with 0.5N HCl and partitioned between water and DCM. The organic layer was washed with brine and dried over Na<sub>2</sub>SO<sub>4</sub>, filtered, concentrated, and purified by silica gel chromatography to afford **S16k** (0.58 g, 27%). <sup>1</sup>H NMR (400 MHz, DMSO-*d*<sub>6</sub>) δ 9.38 (s, 1 H), 8.93 (s, 1 H), 8.24 (s, 1 H), 7.81 (s, 1H), 7.39 (d, 1 H, *J* = 5.6 Hz), 7.24 (d, 1 H, *J* = 8.0 Hz), 7.20 (t, 1 H, *J* = 8.0 Hz), 7.06 (d, 1 H, *J* = 7.6 Hz), 5.66-5.63 (m, 1 H), 3.33 (s, 1 H), 2.41 (s, 3 H), 1.47 (s, 1 H).

*tert*-Butyl (3-((5-(cyclopropanecarbonyl)-2-(methylthio)pyrimidin-4-yl)amino)phenyl) carbamate (**S17i**). To a solution of compound **S16i** (0.93 g, 2.31 mmol) in DCM (20 mL), MnO<sub>2</sub> (2.01 g, 23.1 mmol) was added. The reaction mixture was then heated to reflux for 24 hrs. The solids was filtered off through a Celite pad and washed with DCM (3 × 10 mL). The filtrate was dried over Na<sub>2</sub>SO<sub>4</sub>, filtered, concentrated to afford **S17i** (0.80g, 86.6.0%). <sup>1</sup>H NMR (400 MHz, DMSO-*d*<sub>6</sub>) δ 11.39 (s, 1 H), 9.43 (s, 1 H), 9.22 (s, 1 H), 7.89 (s, 1 H), 7.36 (d, 1 H, *J* = 8.0 Hz), 7.24 (t, 1 H, *J* = 8.0 Hz), 7.11 (d, 1 H, *J* = 8.0 Hz), 3.01-2.96 (m, 1 H), 2.53 (s, 3 H), 1.48 (s, 9 H), 1.14-1.04 (m, 4 H).

*tert*-Butyl (3-(5-cyclopropyl-2-(methylthio)-7-oxopyrido[2,3-*d*]pyrimidin-8(7*H*)-yl)phenyl) carbamate (**10i**). A mixture of compound **S17i** (0.8 g, 2.0 mmol) and methyl (triphenylphosphoranylidene)acetate (1.0 g, 3.0 mmol) in toluene (10 mL) was heated to reflux under argon for 48 hrs and then the solvent was removed under reduced pressure. The resulting crude product was purified by silica gel chromatography to afford **10i** (0.35 g, 40.5%). <sup>1</sup>H NMR (400 MHz, DMSO-*d*<sub>6</sub>) δ 9.54 (s, 1 H), 9.25 s, 1 H), 7.44-7.36 (m, 3 H), 7.87(d, 1 H, *J* = 7.6 Hz), 6.31 (s, 1 H), 2.41-2.38 (m, 1 H), 2.20 (s, 3 H), 1.46 (s, 9 H), 1.12-1.09 (m, 2 H), 0.87-0.84 (m, 2 H).

*N*-(3-(5-Cyclopropyl-2-((2-methoxy-4-(4-methylpiperazin-1-yl)phenyl)amino)-7-oxopyrido [2,3-*d*]pyrimidin-8(7*H*)-yl)phenyl)acrylamide (**9i**). <sup>1</sup>H NMR (400 MHz, DMSO-*d*<sub>6</sub>) δ 10.33 (s, 1H), 9.09 (s, 1 H), 8.11 (s, 1 H), 7.86 (d, 1 H, *J* = 7.6 Hz), 7.56 (s, 1 H), 7.49(t, 1 H, *J* = 8.0 Hz), 7.26 (d, 1 H, *J* = 9.2 Hz), 6.97 (d, 1 H, *J* = 8.4 Hz), 6.52 (d, 1 H, *J* = 2.4 Hz),

6.45 (dd, 1 H,  $J = 10.0, 16.8$  Hz), 6.25 (dd, 1 H,  $J = 2.0, 16.8$  Hz), 6.05-5.99 (m, 2 H), 5.76 (dd, 1 H,  $J = 2.0, 10.0$  Hz), 3.77 (s, 3 H), 3.01 (m, 4 H), 2.43-2.37 (m, 5 H), 2.22 (s, 3 H), 1.09-1.07 (m, 2 H), 0.92-0.89 (m, 2 H).  $^{13}\text{C}$  NMR (125 MHz,  $\text{DMSO-}d_6$ )  $\delta$  163.7, 162.9, 156.6, 152.7, 140.1, 137.3, 131.8, 129.8, 127.6, 124.3, 120.0, 119.9, 119.0, 111.1, 106.7, 106.5, 99.8, 56.0, 54.7, 48.7, 45.9, 10.7, 8.6. HRMS (ESI) for  $\text{C}_{31}\text{H}_{33}\text{N}_7\text{O}_3$   $[\text{M} + \text{H}]^+$ , calcd: 552.2718, found: 552.2712.

*N*-(3-(5-Isopropyl-2-((2-methoxy-4-(4-methylpiperazin-1-yl)phenyl)amino)-7-oxopyrido[2,3-*d*]pyrimidin-8(7*H*)-yl)phenyl)acrylamide (**9j**).  $^1\text{H}$  NMR (400 MHz,  $\text{DMSO-}d_6$ )  $\delta$  10.34 (s, 1 H), 8.92 (s, 1 H), 8.09 (s, 1 H), 7.86 (d, 1 H,  $J = 8.4$  Hz), 7.58 (s, 1 H), 7.50 (t, 1 H,  $J = 8.0$  Hz), 7.25 (d, 1 H,  $J = 8.8$  Hz), 6.99-6.97 (m, 2 H), 6.51 (s, 1 H), 6.43 (dd, 1 H,  $J = 10.0, 16.8$  Hz), 6.32 (s, 1 H), 6.27-6.23 (m, 1 H), 5.99 (br, 1 H), 5.77-5.75 (m, 1 H), 3.77 (s, 3 H), 3.50-3.47 (m, 1 H), 3.02 (m, 4 H), 2.43 (m, 4 H), 2.22 (s, 3 H), 1.29 (d, 6 H,  $J = 6.8$  Hz).  $^{13}\text{C}$  NMR (125 MHz,  $\text{DMSO-}d_6$ )  $\delta$  163.5, 162.8, 156.8, 156.7, 156.1, 140.0, 137.3, 131.8, 129.7, 127.5, 124.2, 119.9, 119.8, 118.9, 112.6, 106.4, 104.9, 99.7, 55.9, 54.7, 48.6, 45.8, 27.1, 22.2. HRMS (ESI) for  $\text{C}_{31}\text{H}_{35}\text{N}_7\text{O}_3$   $[\text{M} + \text{H}]^+$ , calcd: 554.2874, found: 554.2873.

*N*-(3-(2-((2-methoxy-4-(4-methylpiperazin-1-yl)phenyl)amino)-7-oxo-5-(trifluoromethyl)pyrido[2,3-*d*]pyrimidin-8(7*H*)-yl)phenyl)acrylamide (**9k**).  $^1\text{H}$  NMR (400 MHz,  $\text{DMSO-}d_6$ )  $\delta$  10.37 (s, 1 H), 8.71 (s, 1 H), 8.47 (s, 1 H), 7.88 (s, 1 H), 7.63 (s, 1 H), 7.51 (t, 1 H,  $J = 8.0$  Hz), 7.16 (d, 1 H,  $J = 8.8$  Hz), 7.04 (d, 1 H,  $J = 8.4$  Hz), 6.89 (s, 1 H), 6.50 (s, 1 H), 6.44 (dd, 1 H,  $J = 10.0, 16.8$  Hz), 5.96 (br, 1 H), 5.77 (dd, 1 H,  $J = 2.0, 10.4$  Hz), 3.76 (s, 3 H), 3.03 (m, 4 H), 2.42 (t, 4 H,  $J = 4.8$  Hz), 2.22 (s, 3 H).  $^{13}\text{C}$  NMR (125 MHz,  $\text{DMSO-}d_6$ )  $\delta$  163.6, 161.3, 157.4, 155.5, 140.2, 136.7, 135.0, 134.8, 131.8, 129.9, 127.5, 125.6, 123.4, 121.2, 119.1 (q, 1C,  $J = 275$  Hz), 123.9, 119.6, 119.3, 116.8, 106.2, 100.6, 99.6, 55.9, 54.7, 48.5, 45.9. HRMS (ESI) for  $\text{C}_{29}\text{H}_{28}\text{F}_3\text{N}_7\text{O}_3$   $[\text{M} + \text{H}]^+$ , calcd: 580.2279, found: 580.2272.

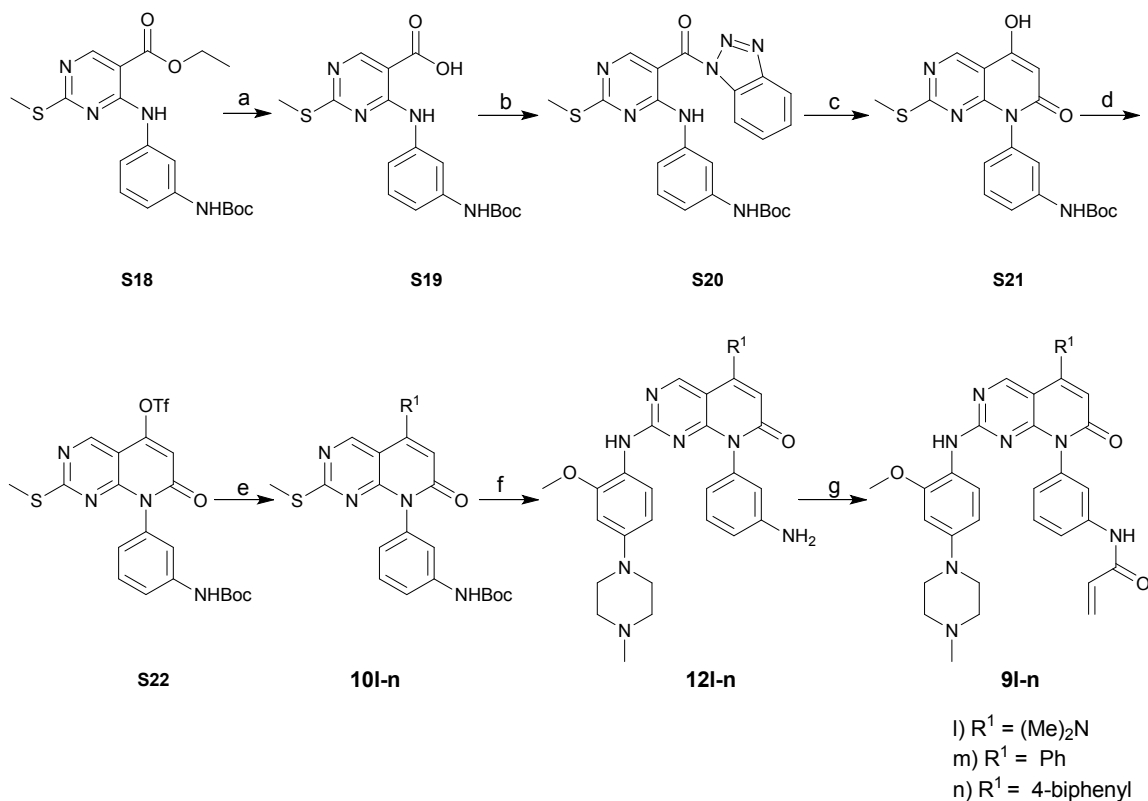

**Scheme S5.** Synthesis of **9I-n**. Reagents and conditions: a) NaOH (1 M in H<sub>2</sub>O), THF, 50 °C, 95%. b) 1H-benzo[d][1,2,3]triazole, EDCI, DCM, rt, 85%. c) EA, KHMDs (1 M in THF), THF, -78 °C to rt, Ar, 17.5%. d) Tf<sub>2</sub>O, Et<sub>3</sub>N, DCM, -78 °C, 82.9%. e) Me<sub>2</sub>NH·HCl, DIPEA, THF, 40 °C, 98.3% or R<sub>1</sub>B(OH)<sub>2</sub>, Pd(PPh<sub>3</sub>)<sub>2</sub>Cl<sub>2</sub> (5%), K<sub>2</sub>CO<sub>3</sub>, THF/H<sub>2</sub>O (5:1, v:v), r.t., Ar, 58-60%. f) 1) m-CPBA, DCM, 0 °C to rt; 2) 2-methoxy-4-(4-methylpiperazin-1-yl)aniline, TFA, 2-Butanol, 110 °C; 3) TFA, DCM, rt, 30-45%. g) acryloyl chloride, DIPEA, DCM, 0 °C, 60-77%.

4-((3-((Tert-butoxycarbonyl)amino)phenyl)amino)-2-(methylthio)pyrimidine-5-carboxylic acid (**S19**). 1 M NaOH (20 mL, 20 mmol) was slowly added into a solution of compound **S18** (4.0 g, 10 mmol) in 20 mL THF, then the mixture was heated at 50 °C for 4 h. The solution was acidified with 1M HCl after the solvent was partly removed under reduced pressure. The formed solid was collected by filtration and dried in a vacuum oven to give **S19** as a white solid (3.5 g, 95%). <sup>1</sup>H NMR (400 MHz, DMSO-*d*<sub>6</sub>) δ 12.75 (br, 1 H), 9.34 (s, 1 H), 8.58 (s, 1 H), 7.78 (s, 1 H), 7.47 (d, 1 H, *J* = 8.0 Hz), 7.19 (t, 1 H, *J* = 8.0 Hz), 7.03 (d, 1 H, *J* = 8.0 Hz).

tert-Butyl (3-((5-(1H-benzo[d][1,2,3]triazole-1-carbonyl)-2-(methylthio)pyrimidin-4-yl)amino)phenyl)carbamate (**S20**). To a mixture of compound **S19** (43.55 g, 115.7 mmol) and EDCI (19.1 g, 115.7 mmol) in dry DCM (400 mL) was added benzotriazole (11.91 g, 115.7 mmol). The reaction mixture was stirred at room temperature for 4h and then the mixture was purified by silica gel chromatography to afford **S20** (46.96 g, 85%). <sup>1</sup>H NMR (400 MHz, DMSO-*d*<sub>6</sub>) δ 9.76 (s, 1 H), 9.42 (s, 1 H), 8.77 (s, 1 H), 8.29 (t, 1H, *J* = 8.0 Hz), 7.84 (t, 1 H, *J* = 7.6 Hz), 7.65 (t, 1 H, *J* = 8.0 Hz), 7.27-7.20 (m, 2 H), 7.10 (d, 1 H, *J* = 8.0 Hz), 2.52 (s, 3 H), 1.47 (s, 9 H).

tert-Butyl (3-(5-hydroxy-2-(methylthio)-7-oxopyrido[2,3-*d*]pyrimidin-8(7*H*)-yl)phenyl)carbamate (**S21**). A solution of potassium hexamethyldisilazide (KHMDs, 1M in THF, 87.8 mL, 87.8 mmol) was slowly added to a solution of EA (8.54 mL, 87.8 mmol) in dry THF (100 mL) under Ar at -78 °C. The reaction mixture was stirred at -78 °C for 0.5 h and then a solution of compound **S20** (16.76 g, 35.1 mmol) in dry THF (200 mL) was slowly added to the mixture during 0.5h. The resulting mixture was stirred at -78 °C for another hour and then slowly warmed to room temperature, stirred for 10h. The reaction was quenched with 1*N* HCl and then treated with 6*N* HCl until pH = 2. The resulting mixture was stirred for another hour, was then diluted with DCM and partitioned between water and DCM. The organic layer was washed with brine and dried over Na<sub>2</sub>SO<sub>4</sub>, filtered, concentrated, and purified by silica gel chromatography to afford **S21** (2.2 g, 15.7%). <sup>1</sup>H NMR (400 MHz, DMSO-*d*<sub>6</sub>) δ 12.15 (br, 1 H), 9.52 (s, 1 H), 8.89 (s, 1 H), 7.42-7.35 (s, 1 H), 6.85 (d, 1 H, *J* = 6.0 Hz), 5.84 (s, 1 H), 2.19 (s, 3 H), 1.46 (s, 9 H).

8-(3-((*tert*-Butoxycarbonyl)amino)phenyl)-2-(methylthio)-7-oxo-7,8-dihydropyrido[2,3-*d*] pyrimidin-5-yl trifluoromethanesulfonate (**S22**). To a solution of compound **S21** (2.2 g, 5.51 mmol) and Et<sub>3</sub>N (2.30 mL, 11.02 mmol) in dry DCM (30 mL), Tf<sub>2</sub>O (0.98 mL, 5.51 mmol) was added at -78 °C. The mixture was stirred at -78 °C for 2 hrs and then the reaction was treated with H<sub>2</sub>O. The organic layer was separated and

washed with brine, dried over Na<sub>2</sub>SO<sub>4</sub>, filtered, concentrated, and purified by silica gel chromatography to afford **S22** (2.43g , 82.9%). <sup>1</sup>H NMR (400 MHz, DMSO-*d*<sub>6</sub>) δ 9.59 (s, 1 H), 8.88 (s, 1 H), 7.59 (s, 1 H), 7.42-7.40 (m, 2 H), 6.98-6.95 (m, 2 H), 1.46 (s, 9 H).

*tert*-butyl (3-(5-(dimethylamino)-2-(methylthio)-7-oxopyrido[2,3-*d*]pyrimidin-8(7*H*)-yl) phenyl)carbamate (**10l**). To a solution of compound **S22** (668.0 mg, 1.25 mmol) in THF (15 mL) dimethylamine hydrochloride (153.5 mg, 1.88 mmol) and DIPEA (0.67 mL, 3.75 mmol) were added. The mixture was heated at 40 °C overnight. The solvent was then removed under reduced pressure. 15.0 mL of DCM was added to the resulting crude product. The organic layer was washed with water, brine, dried over Na<sub>2</sub>SO<sub>4</sub>, filtered, concentrated, and purified by silica gel chromatography to afford **10l** as a white solid (525.0 mg, 98.3%). <sup>1</sup>H NMR (400 MHz, CDCl<sub>3</sub>) δ 8.80 (s, 1 H), 7.46 (s, 1 H), 7.39 (t, 1 H, *J* = 8.0 Hz), 7.29 (s, 1 H), 7.28 (s, 1 H), 6.91 (d, 1 H, *J* = 7.6 Hz), 6.64 (s, 1 H), 5.92 (s, 1 H), 2.15 (s, 3 H), 3.02 (s, 6 H), 1.49 (s, 9 H).

*N*-(3-(5-(dimethylamino)-2-((2-methoxy-4-(4-methylpiperazin-1-yl)phenyl)amino)-7-oxopyrido[2,3-*d*]pyrimidin-8(7*H*)-yl)phenyl)acrylamide (**9l**). <sup>1</sup>H NMR (400 MHz, DMSO-*d*<sub>6</sub>) δ 10.32 (s, 1 H), 8.78 (s, 1 H), 8.03 (s, 1 H), 7.85 (d, 1 H, *J* = 6.4 Hz), 7.54(s, 1 H), 7.48(t, 1 H, *J* = 8.0 Hz), 7.24(d, 1 H, *J* = 8.8 Hz), 6.93 (d, 1 H, *J* = 7.6 Hz), 6.51 (s, 1 H), 6.43 (dd, 1 H, *J* = 10.0, 16.8 Hz), 6.23-6.27 (m, 1 H), 5.99 (br, 1 H), 5.78-5.75 (m, 1 H), 5.59 (s, 1 H), 3.77 (s, 1 H), 3.00 (m, 10 H), 2.43 (m, 4 H), 2.22 (s, 3 H). <sup>13</sup>C NMR (125 MHz, Acetic-*d*<sub>4</sub>) δ 166.5, 166.1, 158.7, 158.4, 157.5, 156.9, 150.7, 146.9, 140.4, 138.2, 132.0, 130.9, 129.0, 126.0, 122.7, 122.0, 121.7, 109.5, 103.6, 101.6, 56.4, 54.0, 48.2, 43.7, 43.5. HRMS (ESI) for C<sub>30</sub>H<sub>35</sub>N<sub>8</sub>O<sub>3</sub> [M + H]<sup>+</sup>, calcd: 555.2827, found: 555.2824.

*tert*-Butyl (3-(2-(methylthio)-7-oxo-5-phenylpyrido[2,3-*d*]pyrimidin-8(7*H*)-yl)phenyl) carbamate (**10m**). Compound **S22** (0.61 g, 1.14 mmol), phenylboronic acid (153.6 mg, 1.26 mmol), Bis(triphenylphosphine)palladium(II) dichloride (40.53 mg, 5%) and K<sub>2</sub>CO<sub>3</sub> (473.6 mg, 3.43 mmol) were added to a mixture solution of THF (10 mL) and H<sub>2</sub>O (2 mL). The mixture was stirred, evacuated, refilled with argon and then stirred at room

temperature for 24 hrs. The mixture was diluted with DCM. The organic layer was washed with brine and dried over Na<sub>2</sub>SO<sub>4</sub>, filtered, concentrated, and purified by silica gel chromatography to afford **10m** (300 mg, 58%). <sup>1</sup>H NMR (400 MHz, DMSO-*d*<sub>6</sub>) δ 9.59(s, 1 H), 8.57 (s, 1 H), 7.63-7.59 (m, 5 H), 7.54 (s, 1 H), 7.47-7.41 (m, 2 H), 6.97 (d, 1 H, *J* = 5.6 Hz), 6.64 (s, 1 H), 2.20 (s, 3 H), 1.47 (s, 9 H).

*N*-(3-(2-((2-Methoxy-4-(4-methylpiperazin-1-yl)phenyl)amino)-7-oxo-5-phenylpyrido[2,3-*d*]pyrimidin-8(7*H*)-yl)phenyl)acrylamide (**9m**). <sup>1</sup>H NMR (400 MHz, DMSO-*d*<sub>6</sub>) δ 10.45 (s, 1 H), 8.42 (s, 1 H), 8.27 (s, 1 H), 7.90 (s, 1 H), 7.64-7.51 (m, 7 H), 7.28 (d, 1 H, *J* = 8.8 Hz), 7.06 (d, 1 H, *J* = 7.6 Hz), 6.57 (s, 1 H), 6.48 (dd, 1 H, *J* = 10.0, 16.8 Hz), 6.38 (s, 1 H), 6.29-6.25 (m, 1 H), 6.03 (br, 1 H), 5.79-5.76 (m, 1 H), 3.78 (s, 3 H), 3.12-2.97 (m, 4 H), 2.67 (m, 4 H). <sup>13</sup>C NMR (125 MHz, DMSO-*d*<sub>6</sub>) δ 163.3, 161.9, 157.3, 156.9, 149.5, 140.0, 137.1, 134.8, 131.8, 129.5, 129.4, 129.0, 128.7, 127.2, 124.0, 119.6, 118.9, 116.5, 106.5, 105.0, 100.1, 55.8, 52.9, 46.7. HRMS (ESI) for C<sub>34</sub>H<sub>33</sub>N<sub>7</sub>O<sub>3</sub> [M + H]<sup>+</sup>, calcd: 588.2718, found: 588.2717.

*N*-(3-(5-([1,1'-Biphenyl]-4-yl)-2-((2-methoxy-4-(4-methylpiperazin-1-yl)phenyl)amino)-7-oxopyrido[2,3-*d*]pyrimidin-8(7*H*)-yl)phenyl)acrylamide (**9n**). <sup>1</sup>H NMR (400 MHz, Acetic-*d*<sub>4</sub>) δ 8.70 (s, 1H), 8.15 (d, 1 H, *J* = 8.0 Hz), 7.88 (d, 2 H, *J* = 8.4 Hz), 7.75 (d, 2 H, *J* = 7.6 Hz), 7.71 (d, 2 H, *J* = 8.0 Hz), 7.64-7.59 (m, 2 H), 7.52-7.39 (m, 4 H), 7.20 (d, 1 H, *J* = 7.6 Hz), 6.77 (s, 1 H), 6.59 (d, 1 H, *J* = 2.0 Hz), 6.45 (d, 2 H, *J* = 5.6 Hz), 6.21 (d, 1 H, *J* = 8.8 Hz), 5.80 (t, 1 H, *J* = 5.6 Hz), 3.85 (s, 3 H), 3.71 (m, 4 H), 3.22 (m, 4 H), 2.95 (s, 3 H). <sup>13</sup>C NMR (125 MHz, DMSO-*d*<sub>6</sub>) δ 163.3, 161.9, 157.3, 156.9, 149.1, 140.0, 139.3, 137.1, 133.8, 131.7, 129.6, 129.4, 129.1, 127.9, 127.2, 126.8, 123.9, 119.6, 118.8, 116.3, 106.1, 104.9, 99.6, 55.7, 54.6, 48.5, 45.8. HRMS (ESI) for C<sub>40</sub>H<sub>37</sub>N<sub>7</sub>O<sub>3</sub> [M + H]<sup>+</sup>, calcd: 664.3031, found: 664.3028.

**Table S1.** Purity of the synthesized compounds **9**.

| Compd.    | MeOH:H <sub>2</sub> O (v:v) | Ret. time (min) | Purity (%) |
|-----------|-----------------------------|-----------------|------------|
| <b>9a</b> | 80:20                       | 6.09            | 98.9       |
| <b>9b</b> | 85:15                       | 5.22            | 99.3       |
| <b>9c</b> | 85:15                       | 6.67            | 98.9       |
| <b>9d</b> | 85:15                       | 8.68            | 96.9       |
| <b>9e</b> | 85:15                       | 6.82            | 98.9       |
| <b>9f</b> | 85:15                       | 5.50            | 98.8       |
| <b>9g</b> | 75:25                       | 10.68           | 98.7       |
| <b>9h</b> | 85:15                       | 6.96            | 95.0       |
| <b>9i</b> | 85:15                       | 6.32            | 96.3       |
| <b>9j</b> | 85:15                       | 6.67            | 96.9       |
| <b>9k</b> | 85:15                       | 7.37            | 98.5       |
| <b>9l</b> | 85:15                       | 5.29            | 99.4       |
| <b>9m</b> | 85:15                       | 5.50            | 97.1       |
| <b>9n</b> | 85:15                       | 13.35           | 96.7       |
| <b>9o</b> | 75:25                       | 10.66           | 97.8       |
| <b>9p</b> | 85:15                       | 4.48            | 97.5       |
| <b>9q</b> | 85:15                       | 4.67            | 96.8       |
| <b>9r</b> | 85:15                       | 5.97            | 97.4       |
| <b>9s</b> | 85:15                       | 6.88            | 97.9       |
| <b>9t</b> | 85:15                       | 6.30            | 98.2       |

Method:Dionex Summit, Column: Diamonsil C18, 5.0 $\mu$ m, 4.6  $\times$  250 mm (Agilent Technologies); detector: PDA-100 photodiode array; pump: p-680A). A flow rate of 1.0 mL/min was used with mobile phase of MeOH in H<sub>2</sub>O with 0.1% modifier (ammonia, v/v)



### **Enzyme-linked immunosorbent assay (ELISA) kinase assay**

Poly (Glu, Tyr)<sub>4:1</sub> (Sigma, St. Louis, MO) (20 µg/mL) was precoated in 96-well ELISA plates as the substrate. The active kinases were incubated with indicated compounds in 1×reaction buffer (50 mmol/L HEPES pH 7.4, 20 mmol/L MgCl<sub>2</sub>, 0.1 mmol/L MnCl<sub>2</sub>, 0.2 mmol/L Na<sub>3</sub>VO<sub>4</sub>, 1 mmol/L DTT) containing 5 µmol/L ATP at 37 °C for 1 h. After incubation, the wells was washed with PBS, and then incubated with anti-phosphotyrosine (PY99) antibody (Santa Cruz, CA) and horseradish peroxidase (HRP) – conjugated secondary antibody in sequence. The wells were visualized using o-phenylenediamine (OPD) and read using a multiwell spectrophotometer (VERSAmax™, Molecular Devices, Sunnyvale, CA, USA) at 492 nm.

### **Kinase profiling study and $K_d$ determination.**

The kinase profiling study and  $K_d$  determination were conducted using the DiscoverX Kinome screening platform (<http://www..com>).

For most assays, kinase-tagged T7 phage strains were prepared in an E. coli host derived from the BL21 strain. E. coli were grown to log-phase and infected with T7 phage and incubated with shaking at 32°C until lysis. The lysates were centrifuged and filtered to remove cell debris. The remaining kinases were produced in HEK-293 cells and subsequently tagged with DNA for qPCR detection. Streptavidin-coated magnetic beads were treated with biotinylated small molecule ligands for 30 minutes at room temperature to generate affinity resins for kinase assays. The liganded beads were blocked with excess biotin and washed with blocking buffer (SeaBlock (Pierce), 1% BSA, 0.05% Tween 20, 1 mM DTT) to remove unbound ligand and to reduce non-specific binding. Binding reactions were assembled by combining kinases, liganded affinity beads, and test compounds in 1x binding buffer (20% SeaBlock, 0.17x PBS, 0.05% Tween 20, 6 mM DTT). All reactions were performed in polystyrene 96-well plates in a final volume of 0.135 ml. The assay plates were incubated at room temperature with shaking for 1 hour and the affinity beads were washed with wash buffer (1x PBS, 0.05% Tween 20). The beads were then re-suspended in elution buffer (1x PBS, 0.05% Tween 20, 0.5  $\mu$ M non-biotinylated affinity ligand) and incubated at room temperature with shaking for 30 minutes. The kinase concentration in the eluates was measured by qPCR.

An 11-point 3-fold serial dilution of each test compound was prepared in 100% DMSO at 100x final test concentration and subsequently diluted to 1x in the assay (final DMSO concentration = 1%). Most  $K_d$ s were determined using a compound top concentration = 30,000 nM. If the initial  $K_d$  determined was < 0.5 nM (the lowest concentration tested), the measurement was repeated with a serial dilution starting at a lower top concentration. A  $K_d$  value reported as 40,000 nM indicates that the  $K_d$  was determined to be >30,000 nM.

Binding constants (Kds) were calculated with a standard dose-response curve using the Hill equation:

$$\text{Response} = \text{Background} + \frac{\text{Signal} - \text{Background}}{1 + (\text{Kd}^{\text{Hill Slope}} / \text{Dose}^{\text{Hill Slope}})}$$

The Hill Slope was set to -1.

Curves were fitted using a non-linear least square fit with the Levenberg-Marquardt algorithm.

### **Western blot analysis**

Western blotting was conducted as previously reported. In brief, cells were seeded to six-well plates and incubated overnight, and then starved with serum-free medium for 24 h. Starved cells were treated with or without different concentrations of compounds for 2 h and then stimulated with or without EGF (50 ng/ml) for 15 min. Cell samples were then lysed in 1×SDS lysis buffer. Proteins were resolved by SDS-PAGE and transferred onto polyvinylidene difluoride membranes (Millipore), which were blocked with nonfat milk and hybridized with specific primary antibodies. The bands were visualized using an enhanced chemiluminescence reagent (GE Healthcare) after hybridization with a HRP-conjugated secondary antibody. For the washing-out experiments, cells were seeded in 96-well plates and incubated overnight. After the treatment of compounds at indicated concentration for 2 h, cells were collected at indicated time points and processed for Western blot analysis.

## Irreversibility assessments for compounds

The mobility shift assay were used to examine irreversible binding mode of compound **9f** with EGFR<sup>L858R/T790M</sup>. Compound **4** as used as positive control in this assay. The EGFR<sup>L858R/T790M</sup> protein and compound **9f** or **4** are incubated together for 30 min, and then diluted into standard enzyme assay mixtures containing ATP and substrate peptide (5-FAM-EEPLYWSFPAKKK-CONH<sub>2</sub>, 1.5  $\mu$ M). Meanwhile, control reactions with inhibitor added to the reaction mix without being incubated with enzyme were also conducted. The microplate was then placed in the EZ Reader (Caliper Life Sciences, MA) and wells were continuously sampled for 120 min.

In general, preincubation of a reversible inhibitor with the protein results in similar kinase activity with that of none preincubation control, whereas, preincubation of an irreversible inhibitor will dramatically decreased the kinase activity compared with control. The results in Figure S1 showed that preincubation of the EGFR<sup>L858R/T790M</sup> protein with **9f** caused an obvious decrease of kinase activity relative to the non-incubation sample, which is quite similar to that of compound **4**, supporting the irreversible binding of **9f** with the protein.

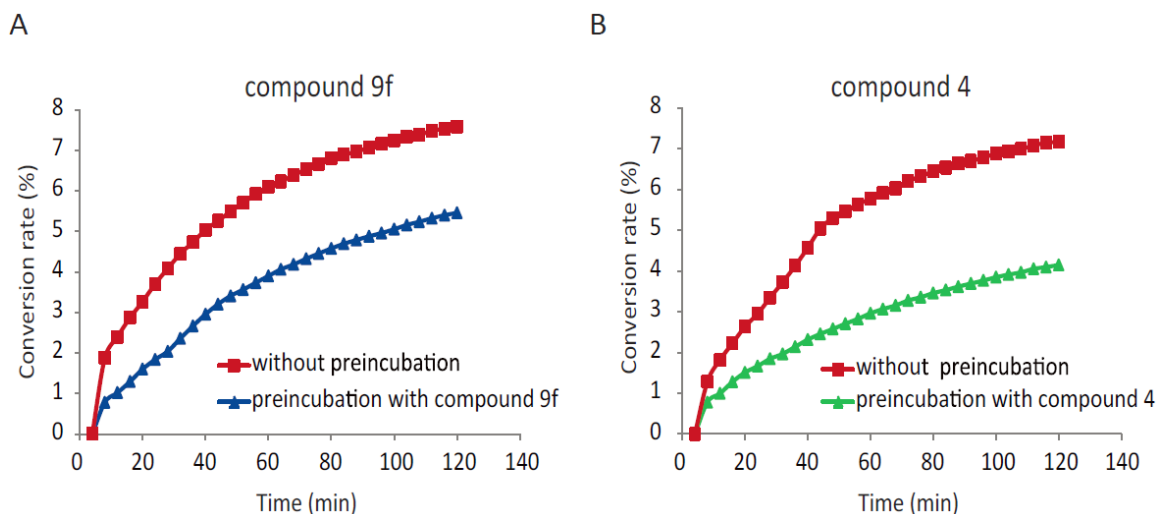

**Fig. S1.** **9f** irreversibly binds with EGFR<sup>L858R/T790M</sup>.

### Cell lines and proliferation assay

NCI-H1975, A431 cancer cells and, GES-1, LO2, WI-38 and MCF-10A normal cell lines were obtained from American Type Culture Collection (ATCC, Rockville, MD) and maintained in strict accordance with the instruction and established procedures. The cell proliferation assay was evaluated using SRB (Sulforhodamine B) assay treated for 72 hrs with different concentrations of compounds.

**Table S2.** Anti-proliferative activities of the new EGFR T790M mutant inhibitors.<sup>a</sup>

| Cpds      | Anti-proliferation (IC <sub>50</sub> , nM) |                 |                                |
|-----------|--------------------------------------------|-----------------|--------------------------------|
|           | H1975                                      | A431            | Selectivity Ratio <sup>b</sup> |
| <b>9a</b> | 3.7 ± 2.7                                  | <16             | <5.0                           |
| <b>9e</b> | 28.9 ± 11.6                                | 236.8 ± 165.2   | 8.2                            |
| <b>9f</b> | 2.8 ± 2.0                                  | 865.6 ± 426.1   | 311.3                          |
| <b>9i</b> | 24.8 ± 17.2                                | 4250.8 ± 2602.0 | 171.5                          |
| <b>9n</b> | >10000                                     | >50000          | NA                             |
| <b>9p</b> | 6.8 ± 0.4                                  | 1104.0 ± 589.8  | 162.8                          |
| <b>9r</b> | 5.3 ± 1.2                                  | 2186.5 ± 575.4  | 415.1                          |
| <b>9t</b> | 11.6 ± 10.2                                | 7468.7 ± 948.4  | 645.2                          |

|           |             |                  |       |
|-----------|-------------|------------------|-------|
| <b>9u</b> | 16.1 ± 10.0 | 562.9 ± 124.6    | 35.0  |
| <b>9v</b> | 21.0 ± 9.4  | 687.4 ± 35.3     | 32.7  |
| <b>3</b>  | 69.8 ± 43.9 | 16.7 ± 4.0       | 0.2   |
| <b>4</b>  | 50.1 ± 23.2 | 5550.4 ± 1680.3  | 110.7 |
| <b>5</b>  | 43.1 ± 12.1 | 10117.1 ± 2919.5 | 274.0 |

<sup>a</sup> The anti-proliferative activities of the compounds were evaluated using SRB assay. The data were means from at least four independent experiments. <sup>b</sup> Ratio = IC<sub>50</sub> (A431) / IC<sub>50</sub> (H1975). NA means not available.

**Table S3.** Anti-proliferative activities of **9f** against a panel of normal cell lines.

| Cpds      | Anti-proliferation (IC <sub>50</sub> , μM) |             |             |             |
|-----------|--------------------------------------------|-------------|-------------|-------------|
|           | GES-1                                      | LO2         | WI-38       | MCF-10A     |
| <b>9f</b> | 4.591±0.248                                | 2.493±0.683 | 7.231±0.489 | 2.016±0.316 |

# <sup>1</sup>H NMR and <sup>13</sup>C NMR spectra of compounds 9

## <sup>1</sup>H, <sup>13</sup>C NMR spectra of compound 9a

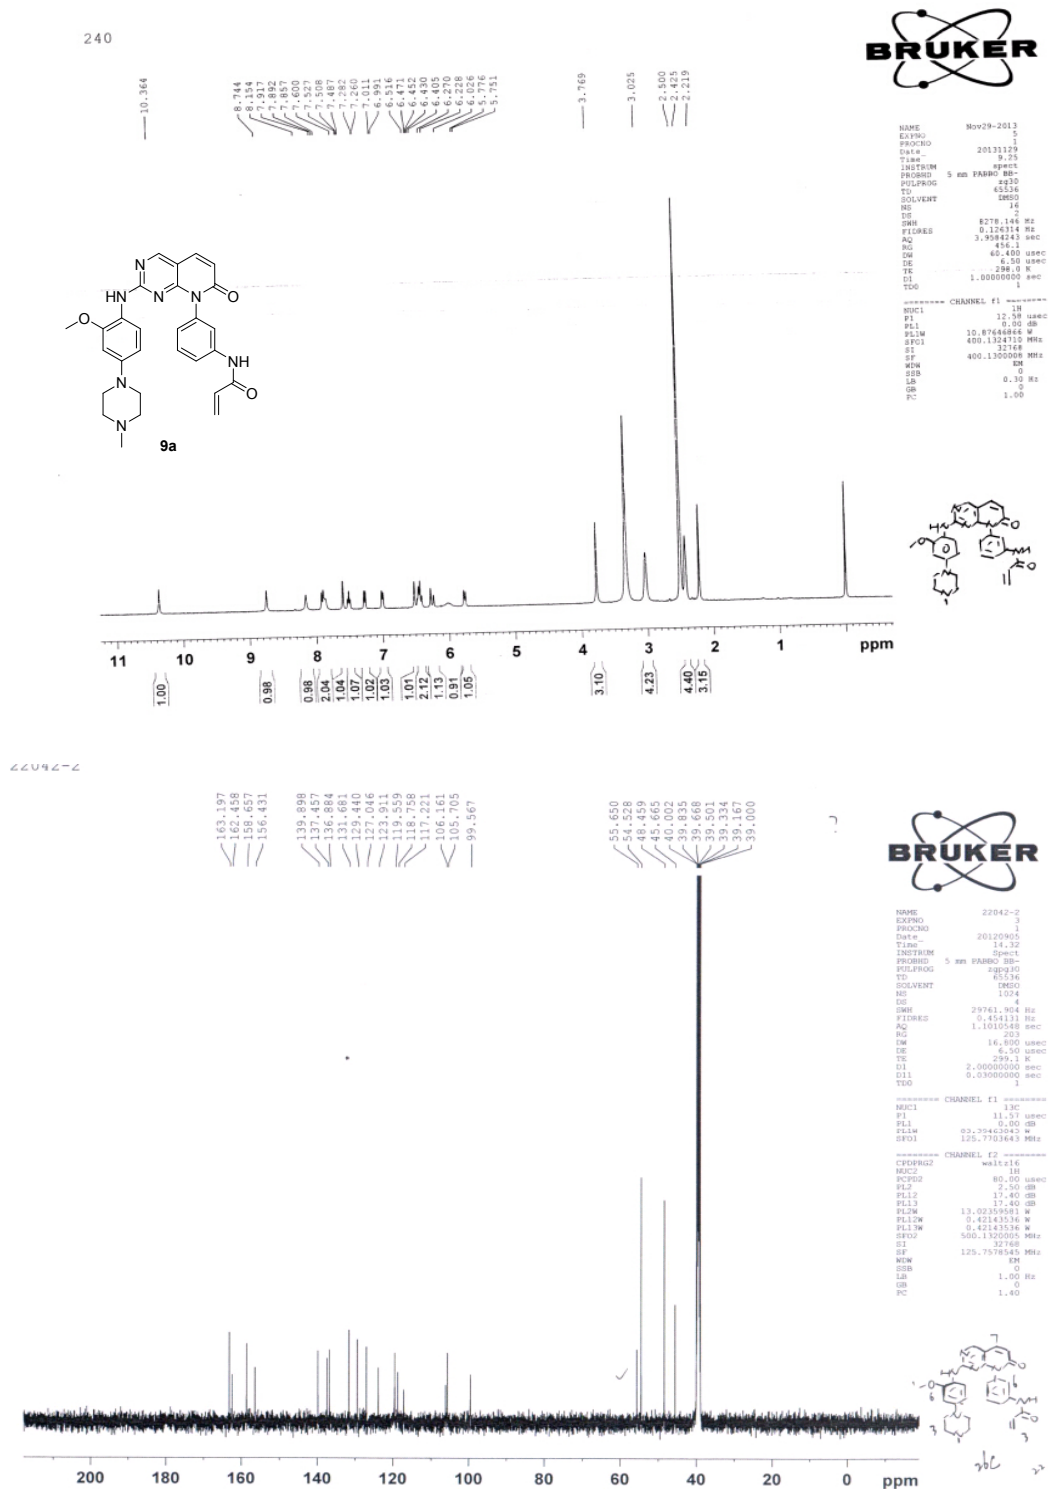

# $^1\text{H}$ , $^{13}\text{C}$ NMR spectra of compound **9b**

XTF-288

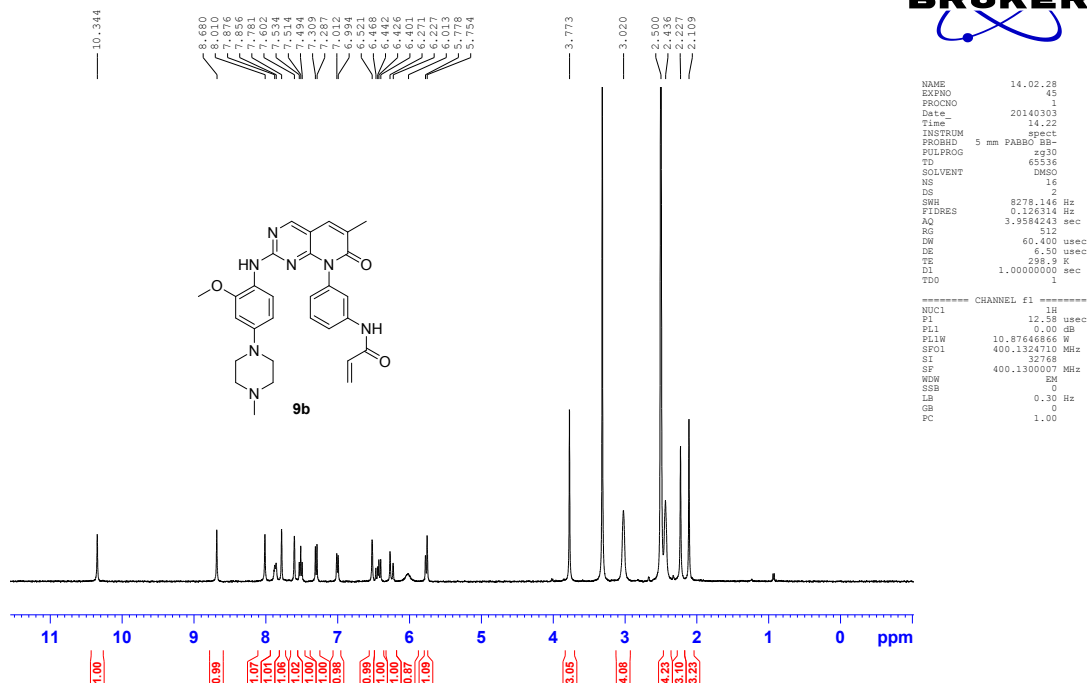

XTF-288

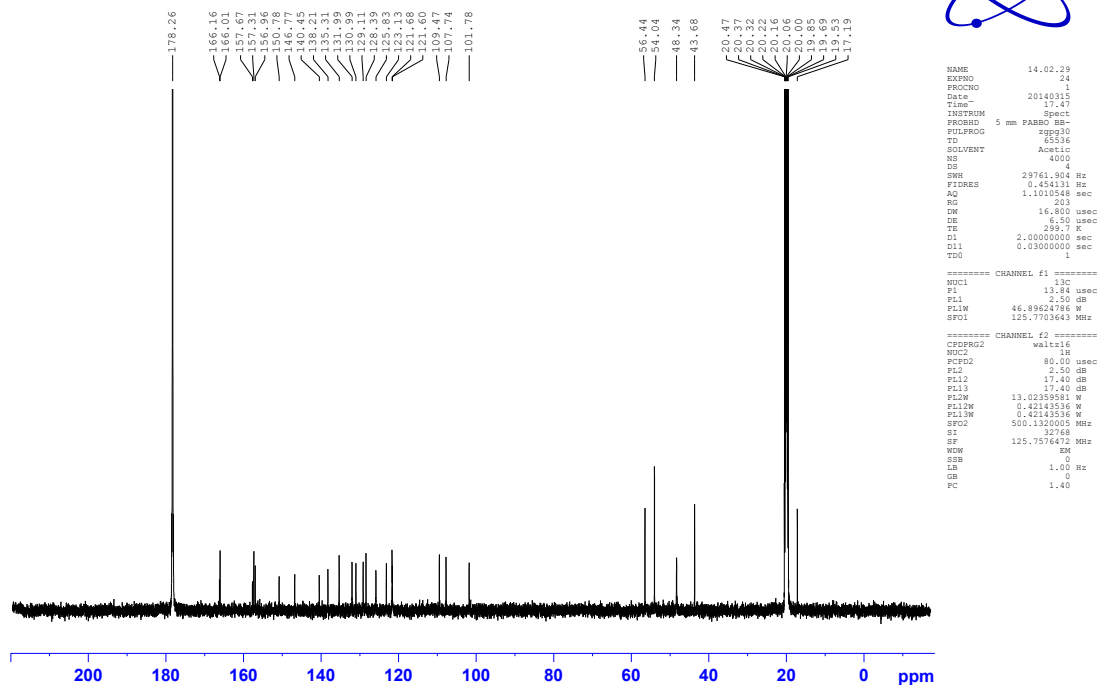



## XTF-251

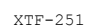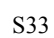

# <sup>1</sup>H, <sup>13</sup>C NMR spectra of compound 9d

XTF-203

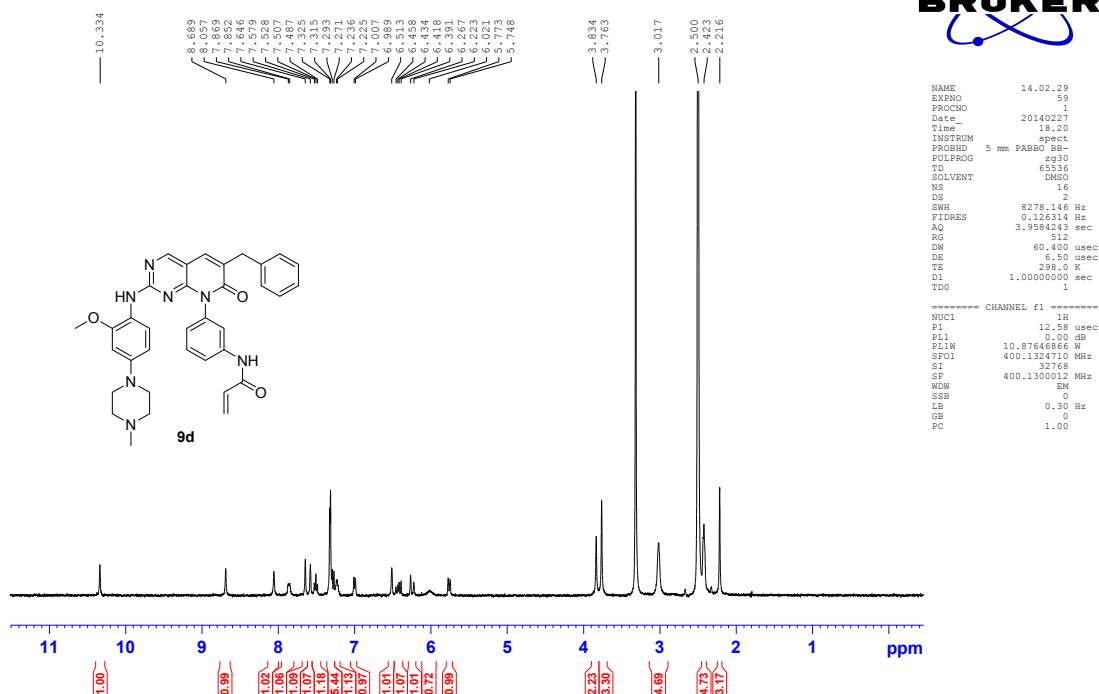

XTF-203

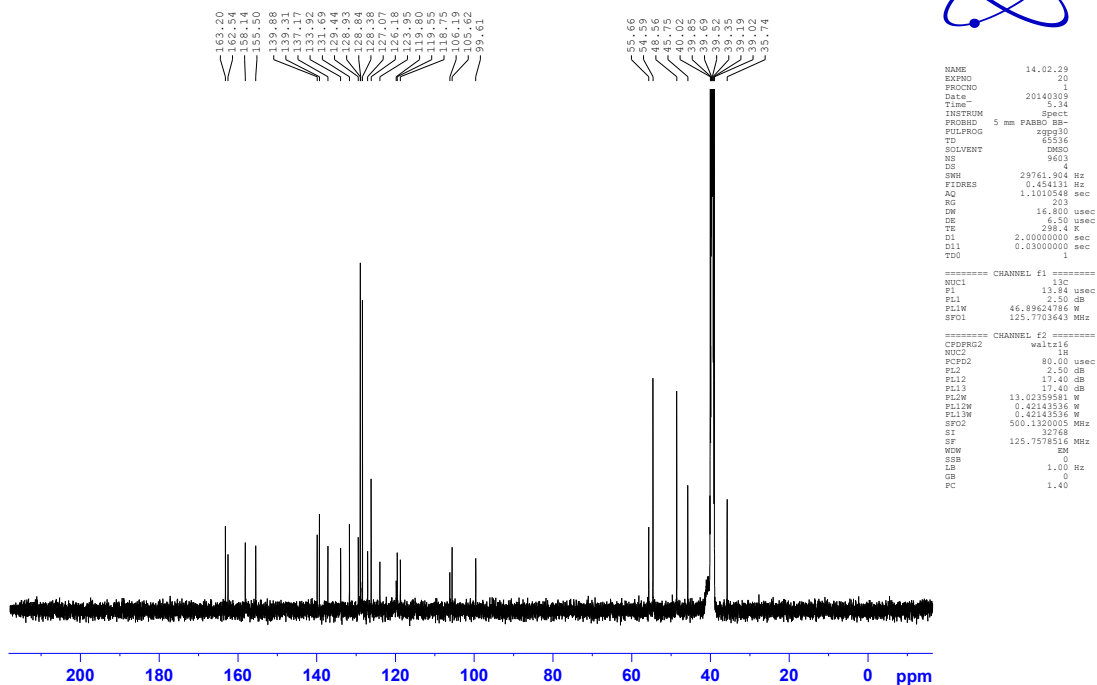

# <sup>1</sup>H, <sup>13</sup>C NMR spectra of compound 9e

XTF-294

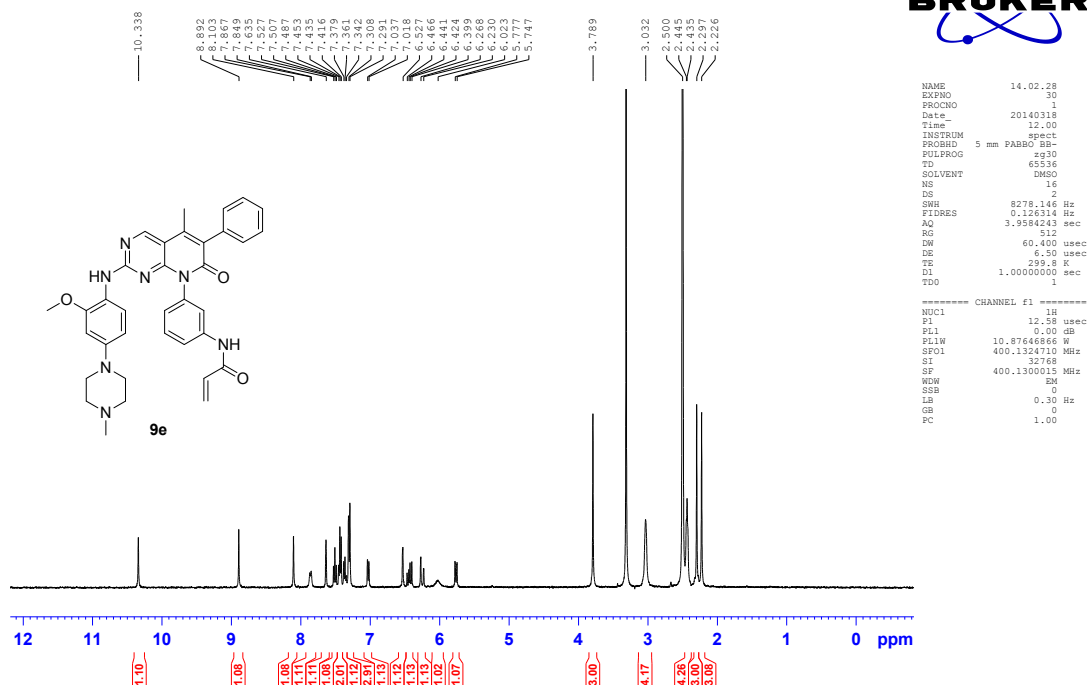

XTF-294

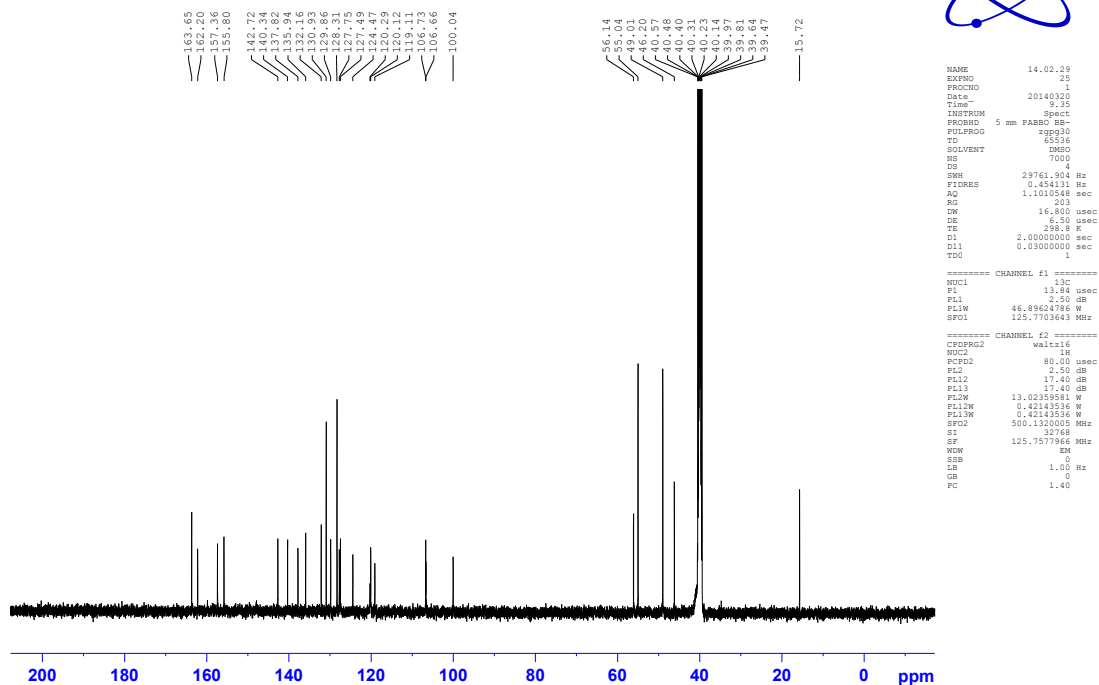

# $^1\text{H}$ , $^{13}\text{C}$ NMR spectra of compound **9f**

262

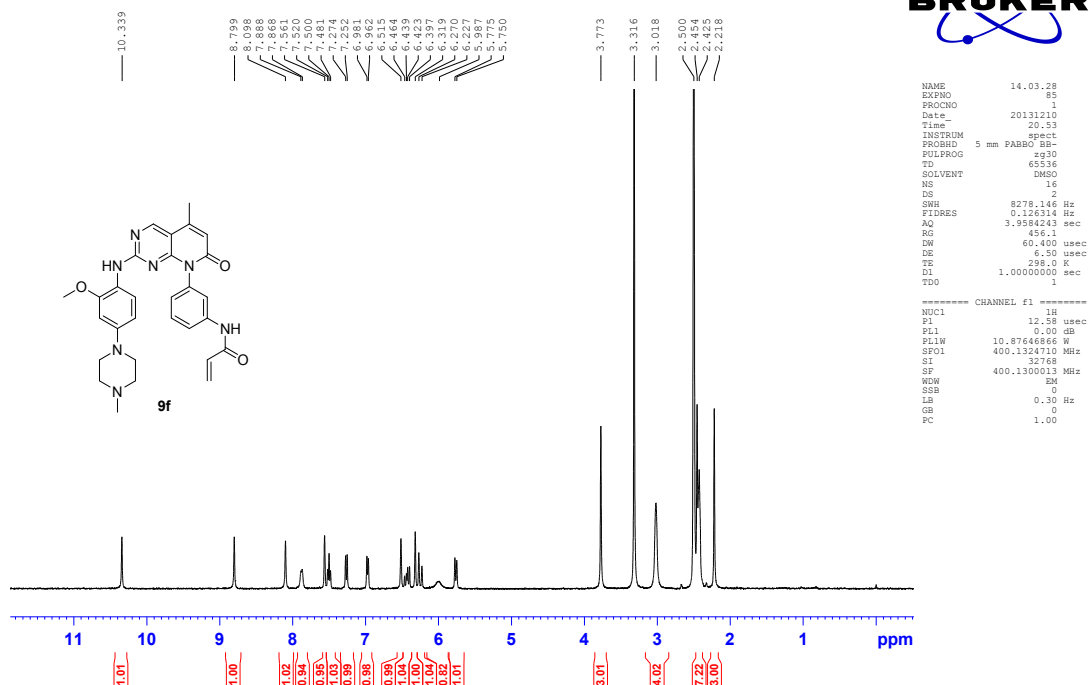

XTF-262

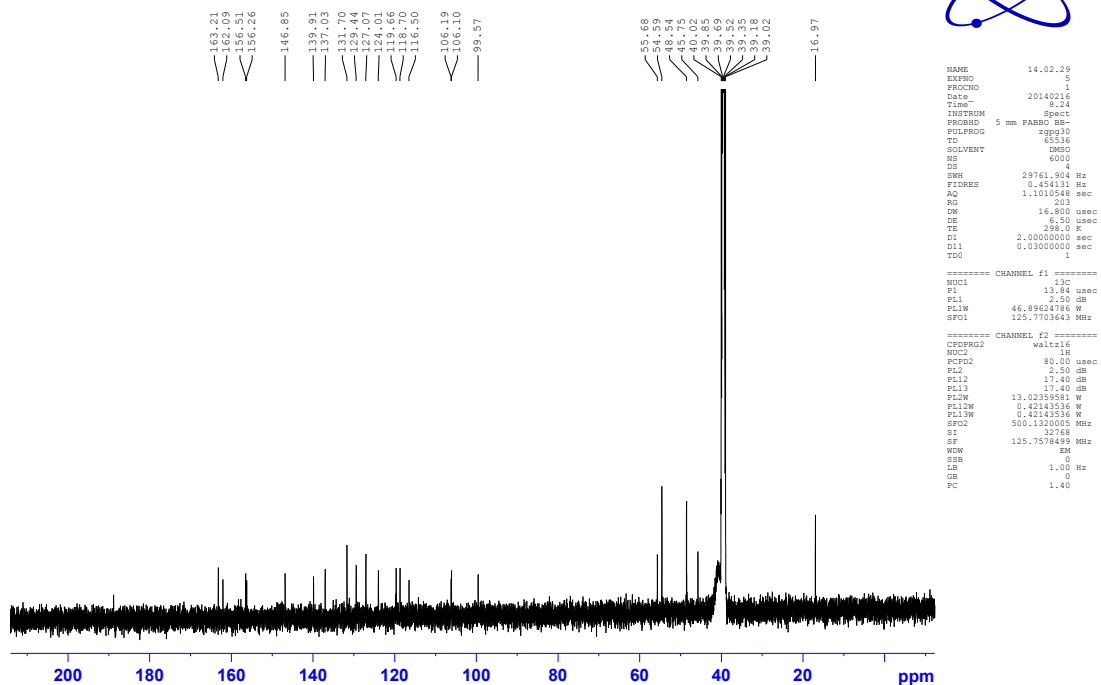

# $^1\text{H}$ , $^{13}\text{C}$ NMR spectra of compound **9g**

263

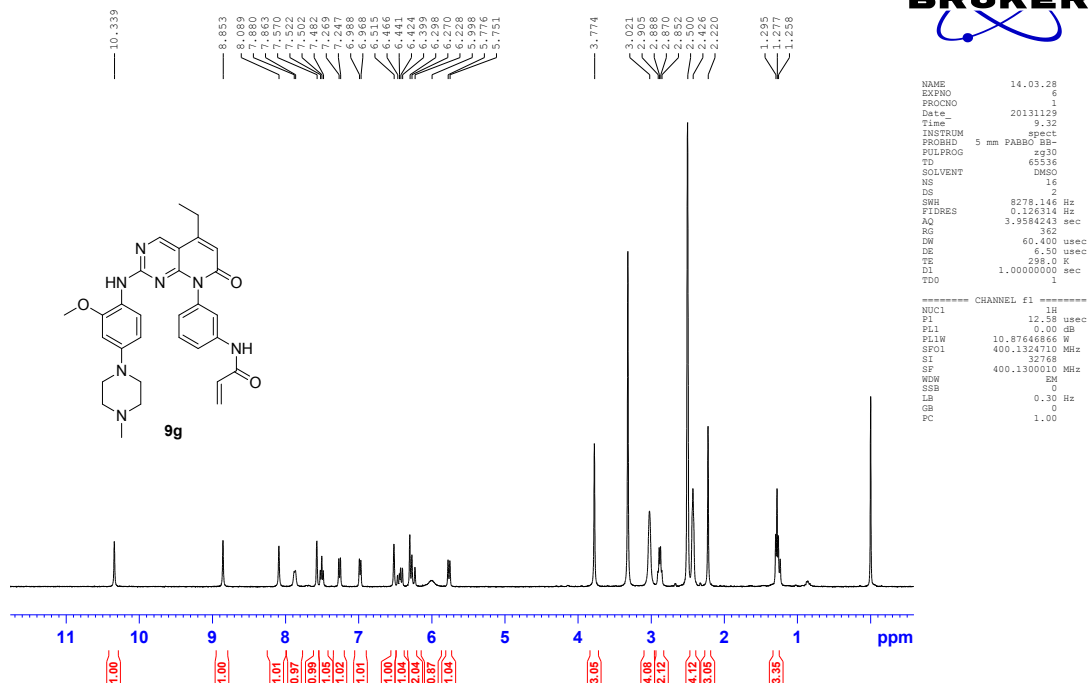

XTF-263

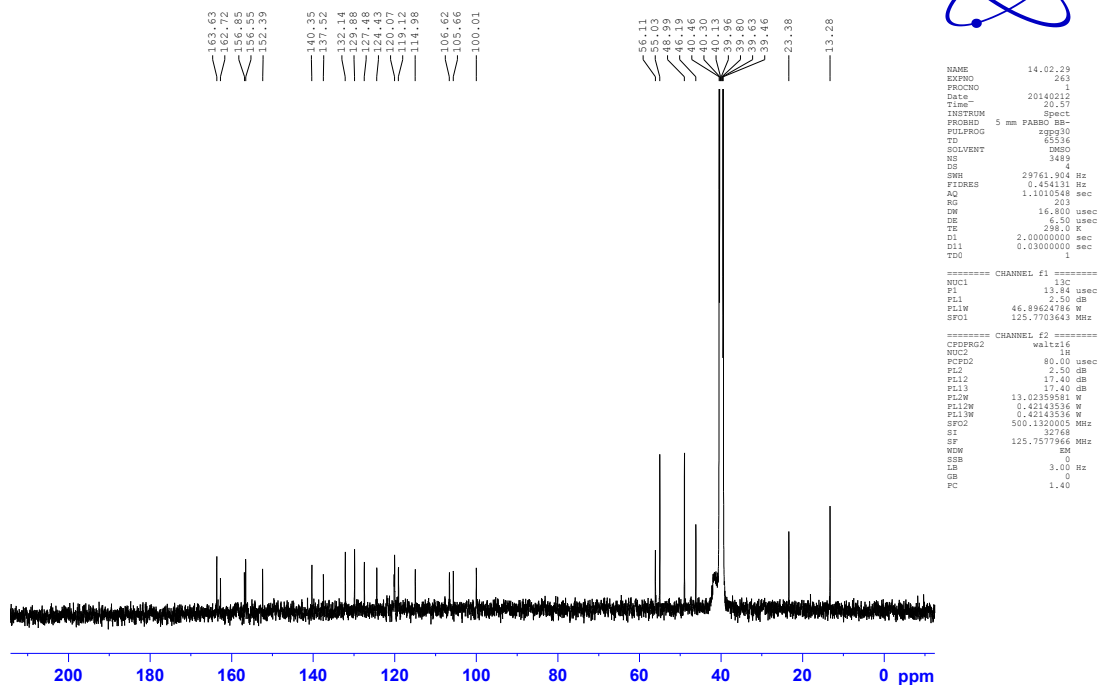

# <sup>1</sup>H, <sup>13</sup>C NMR spectra of compound 9h

35841-1

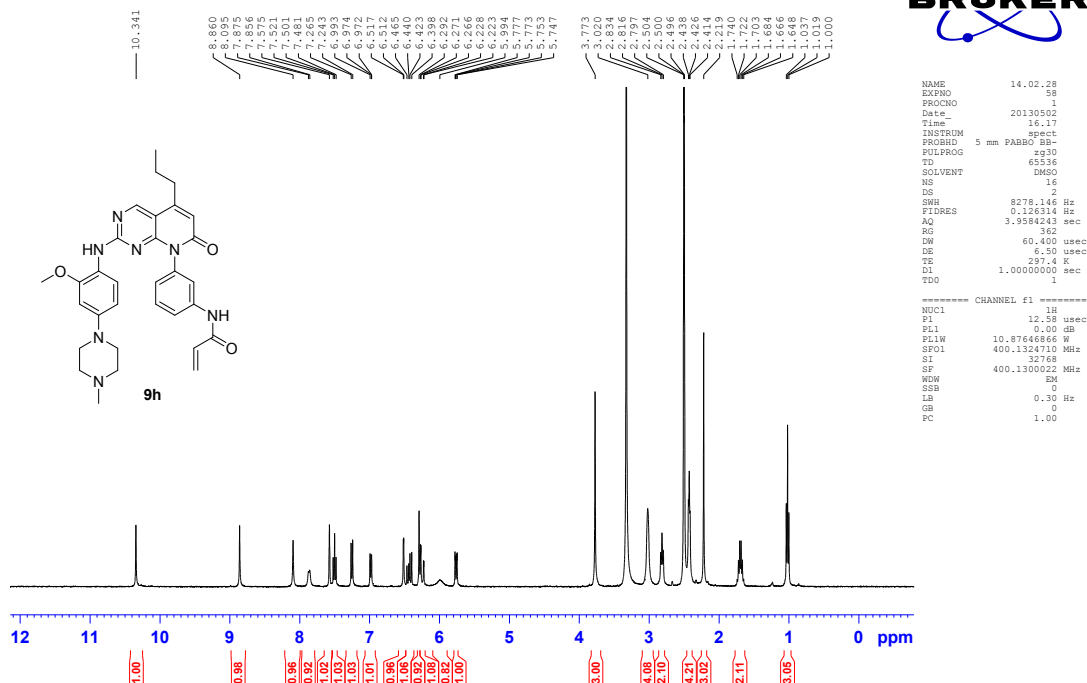

XTF-264

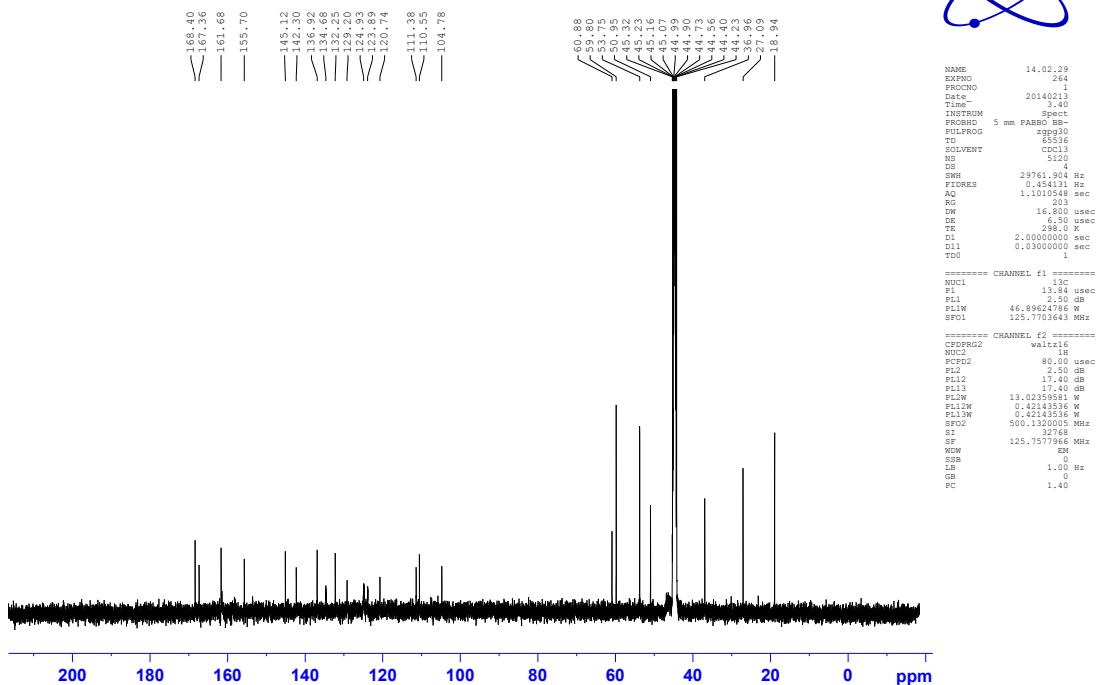

# <sup>1</sup>H, <sup>13</sup>C NMR spectra of compound 9i

XTF-278

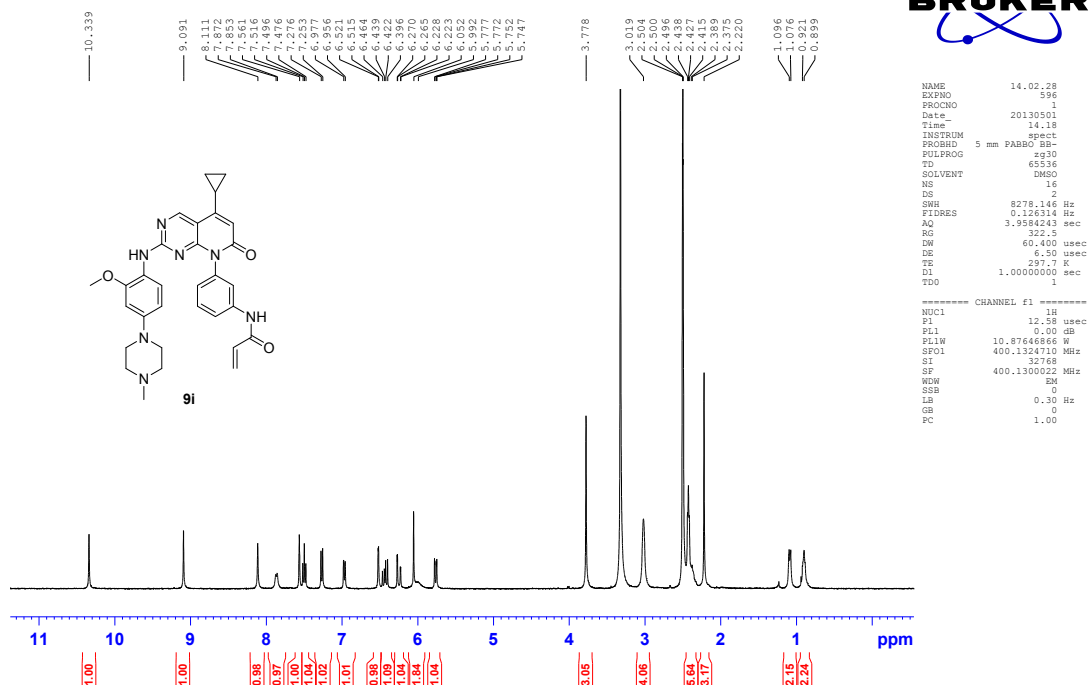

XTF-278

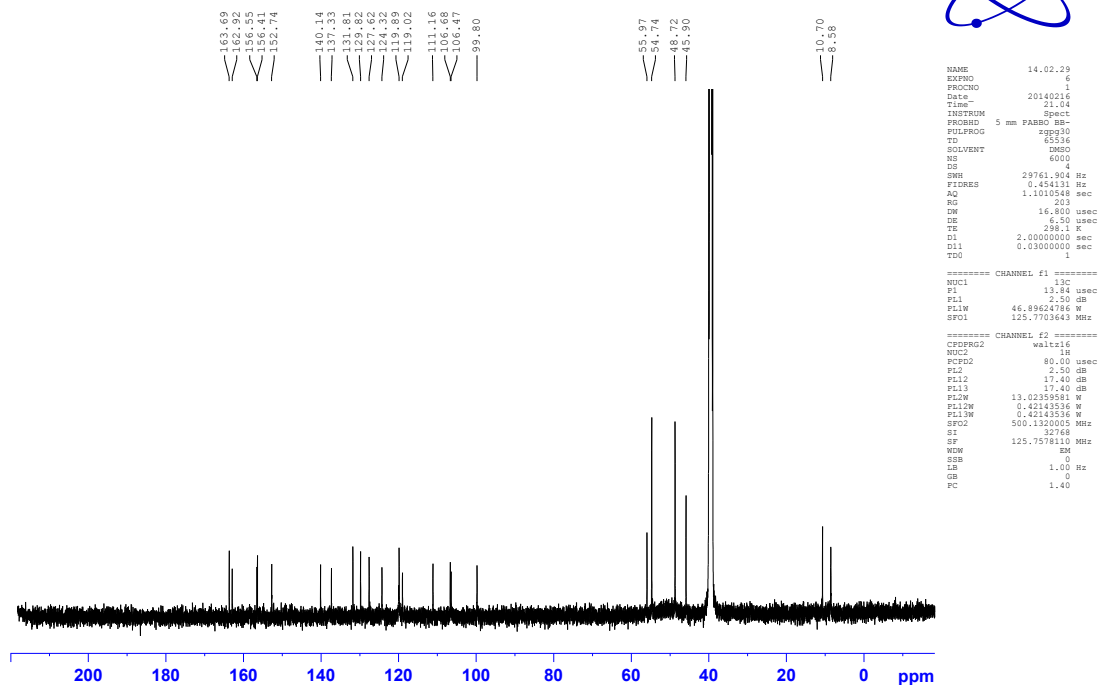

## 266

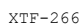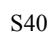



## XTF-269

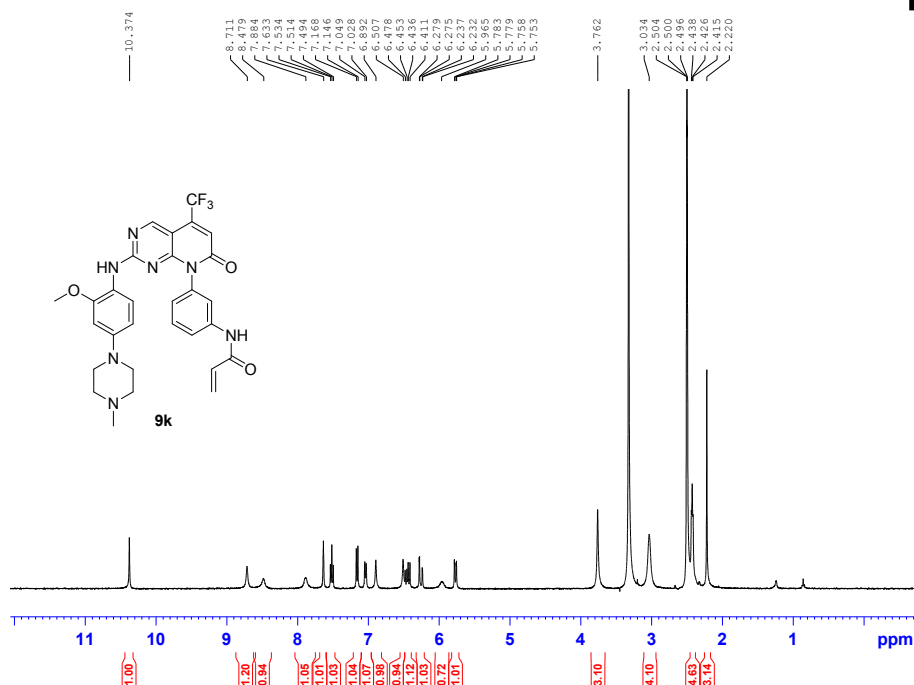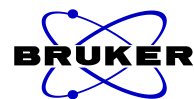

```
NAME                               14.02.28
EXPNO                              602
PROCNO                             1
Date_                            20130901
Time                               15.50
INSTRUM                          spect
PROBHD     5 mm PABBO-1H-BB      zgpg30
PULPRG                           zgpg30
TD                                65536
SOLVENT                         DMSO
NS                                 16
DS                                  2
SWH                               8278.144 Hz
FIDRES                            0.126314 Hz
AQ                                3.9584243 sec
SFO                                322.5 MHz
RG                                60.400 usec
DE                                DE 6.50 usec
TE                                T2 297.6 K
D1                                1.0000000 sec
TDO                                1
===== CHANNEL f1 =====
NUC1    1H
P1       12.58 usec
PL1      0.00 dB
PL12     10.87646866 Hz
RF1      400.1330002 MHz
SI        32768
SF       400.1330002 MHz
WDW      EM
SSB      0
GB        0.30 Hz
PC        1.00
LB        0
```

XTF-269

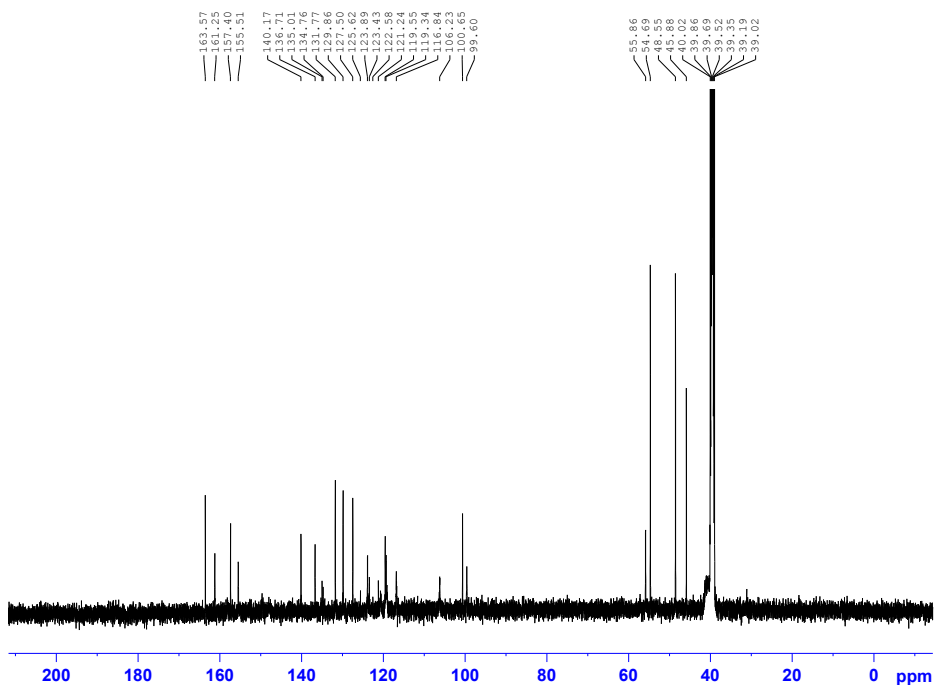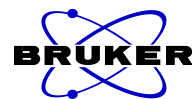[illegible]

# $^1\text{H}$ , $^{13}\text{C}$ NMR spectra of compound **9I**

35875

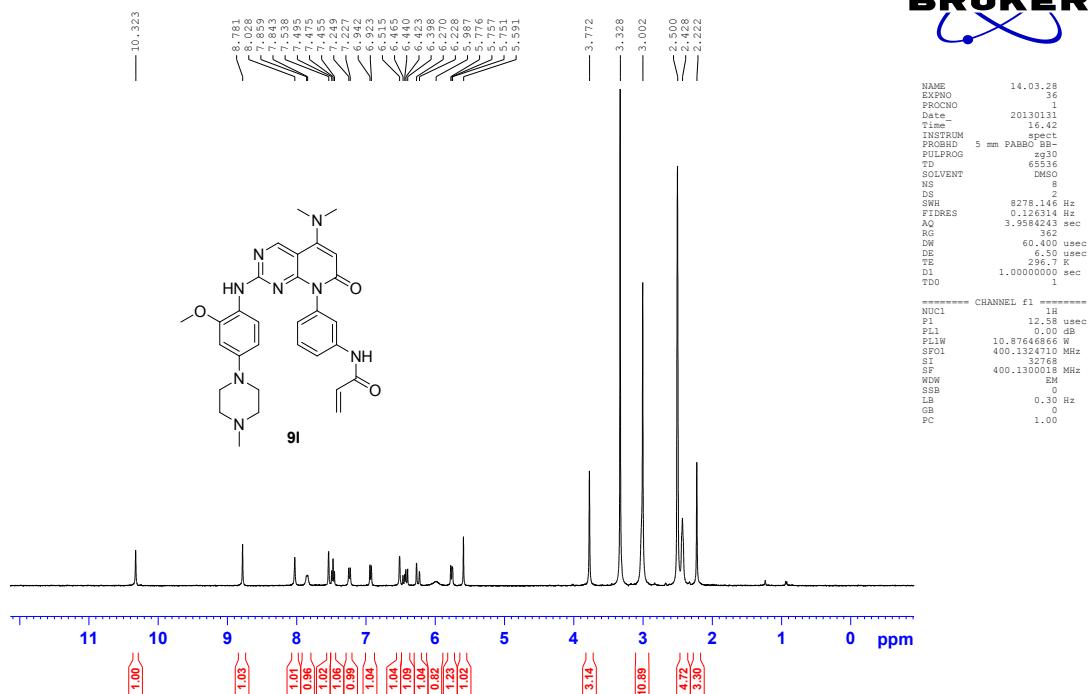

XTF-267

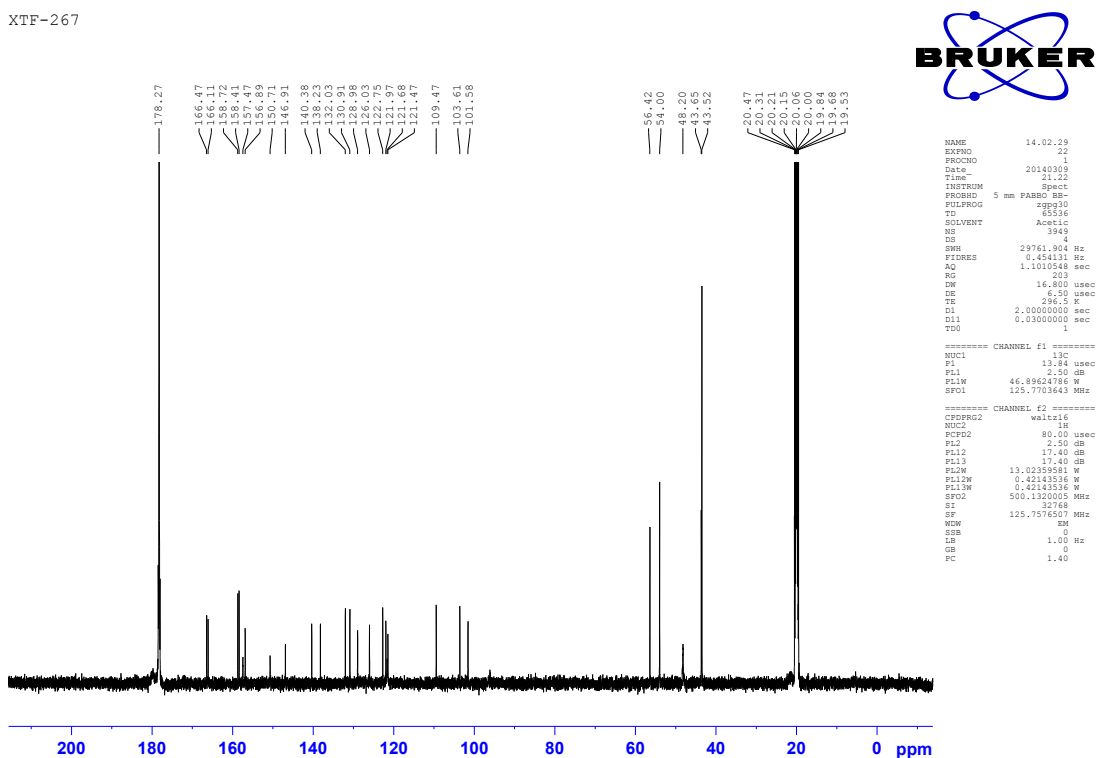

# $^1\text{H}$ , $^{13}\text{C}$ NMR spectra of compound **9m**

265

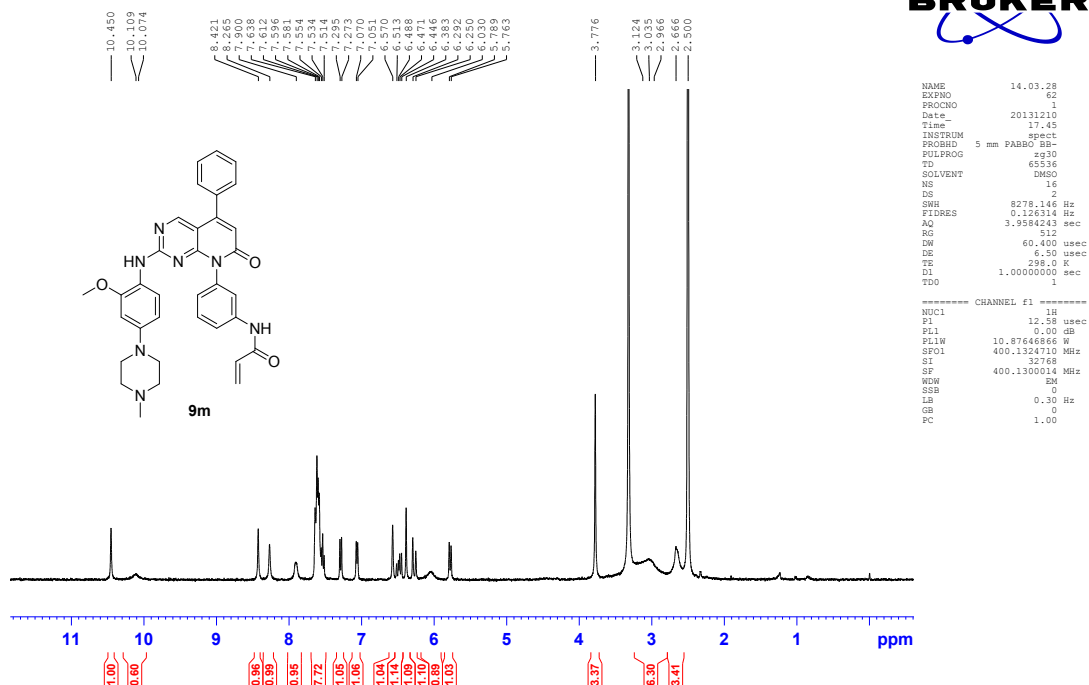

XTF-265

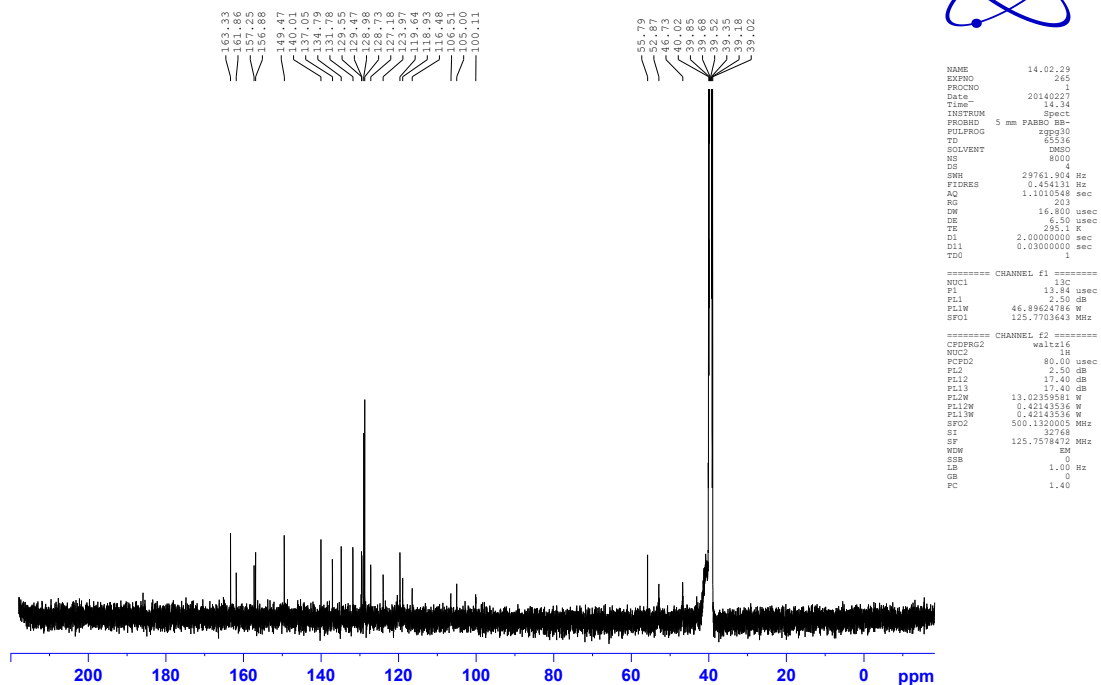

# <sup>1</sup>H, <sup>13</sup>C NMR spectra of compound 9n

279

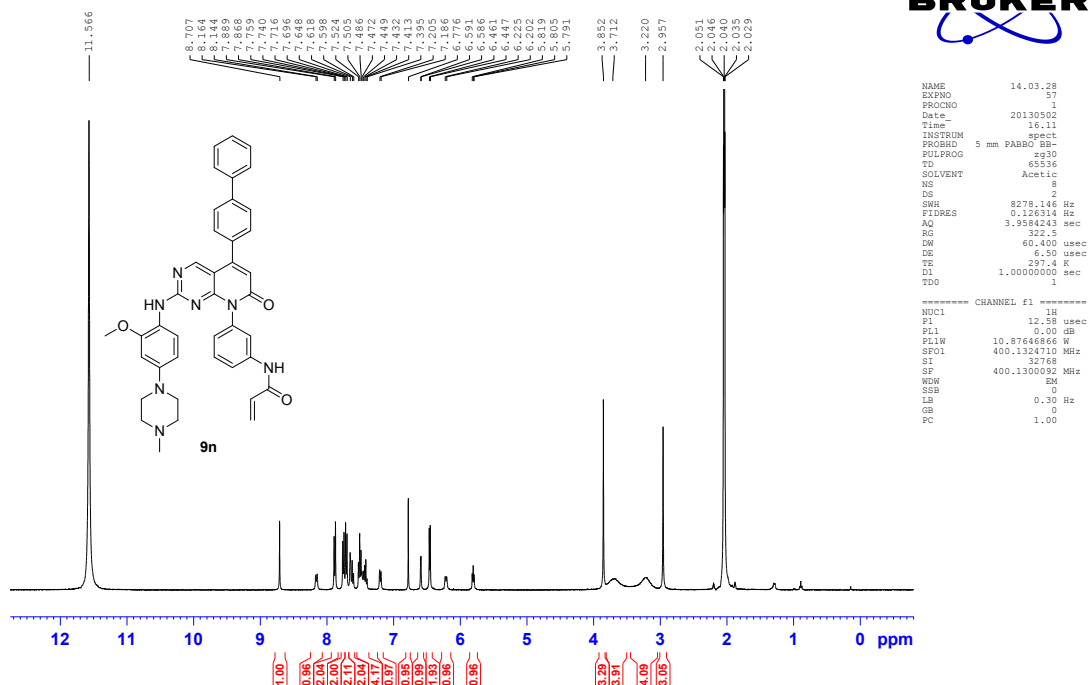

XTF-279

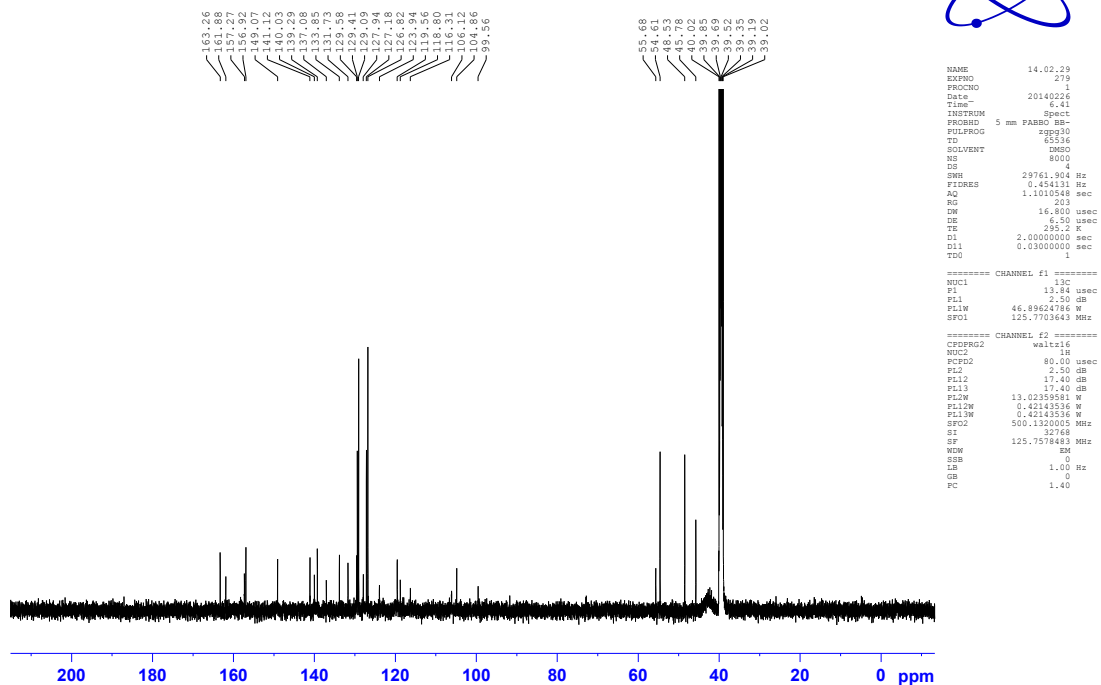

# <sup>1</sup>H, <sup>13</sup>C NMR spectra of compound 9o

81076

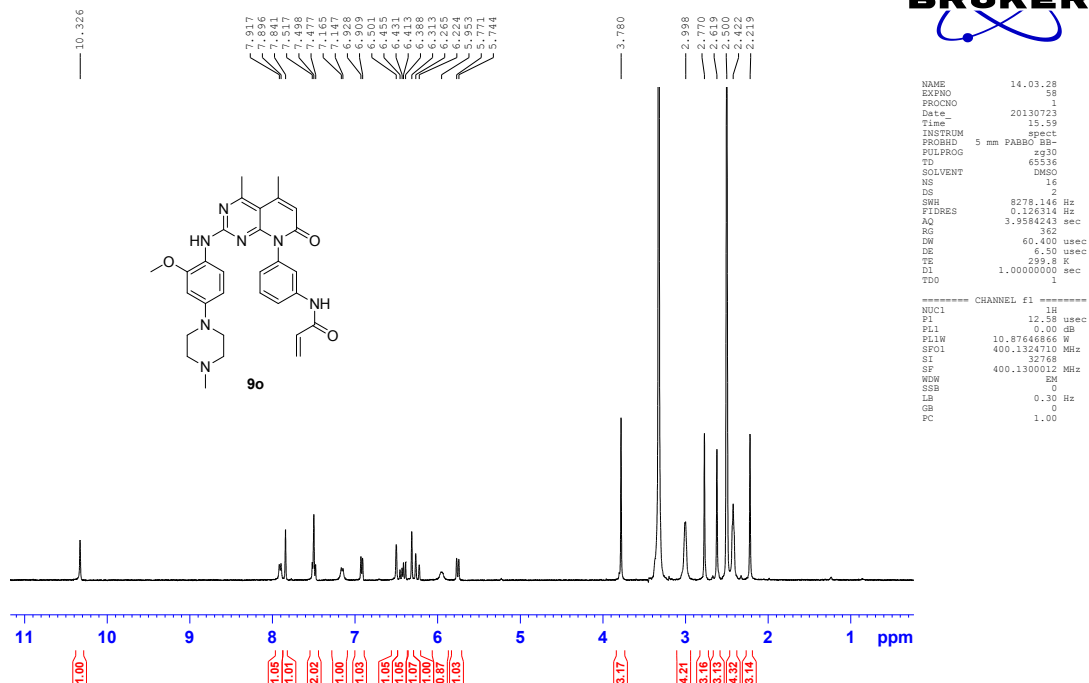

XTF-296

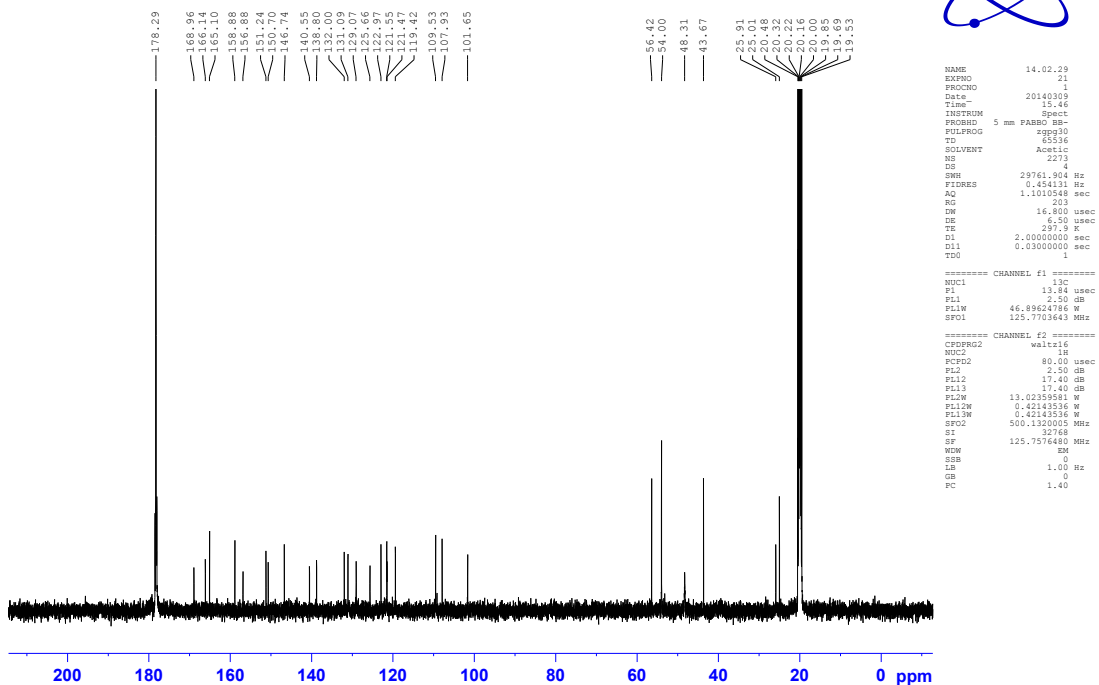

# $^1\text{H}$ , $^{13}\text{C}$ NMR spectra of compound **9p**

35984

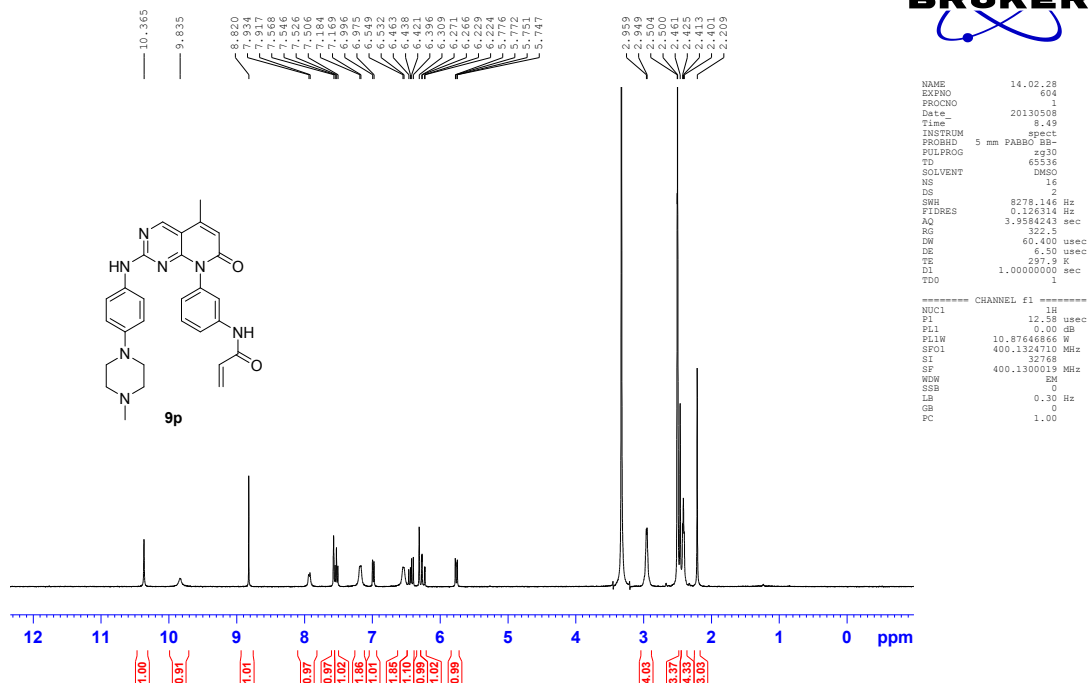

XTF-35984

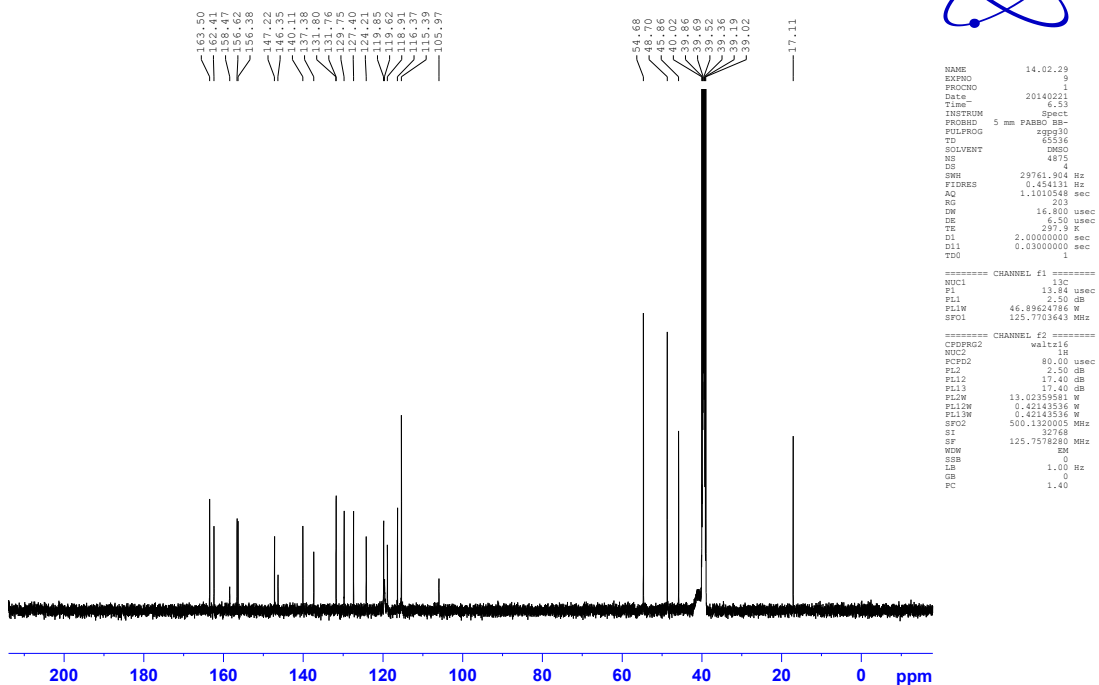

# <sup>1</sup>H, <sup>13</sup>C NMR spectra of compound 9q

XTF-284

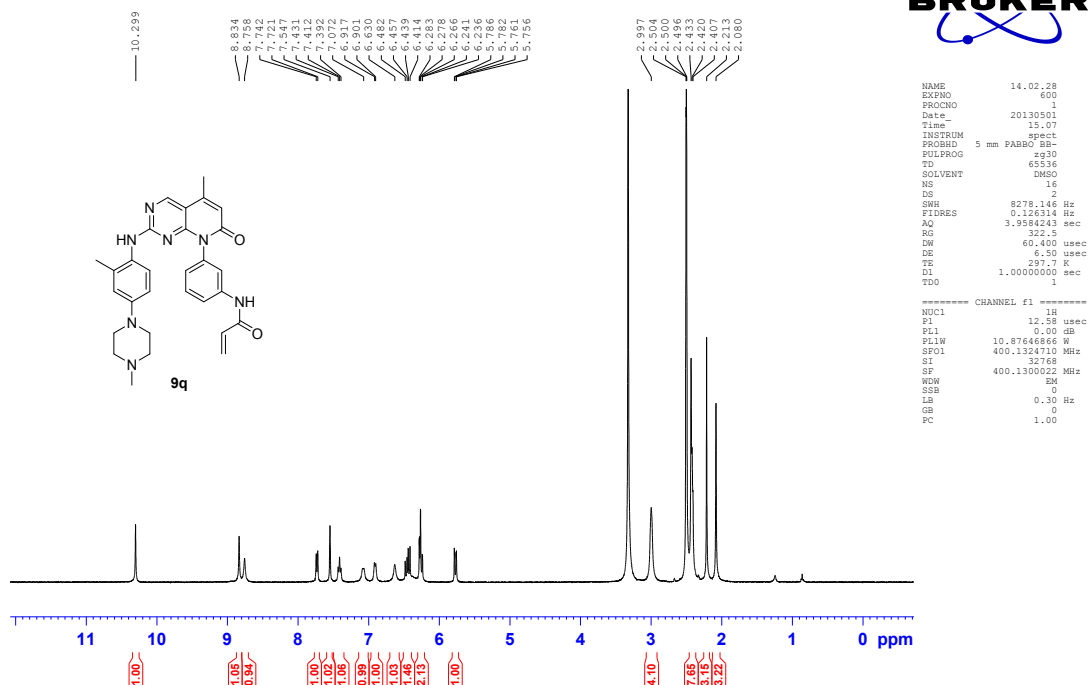

XTF-284

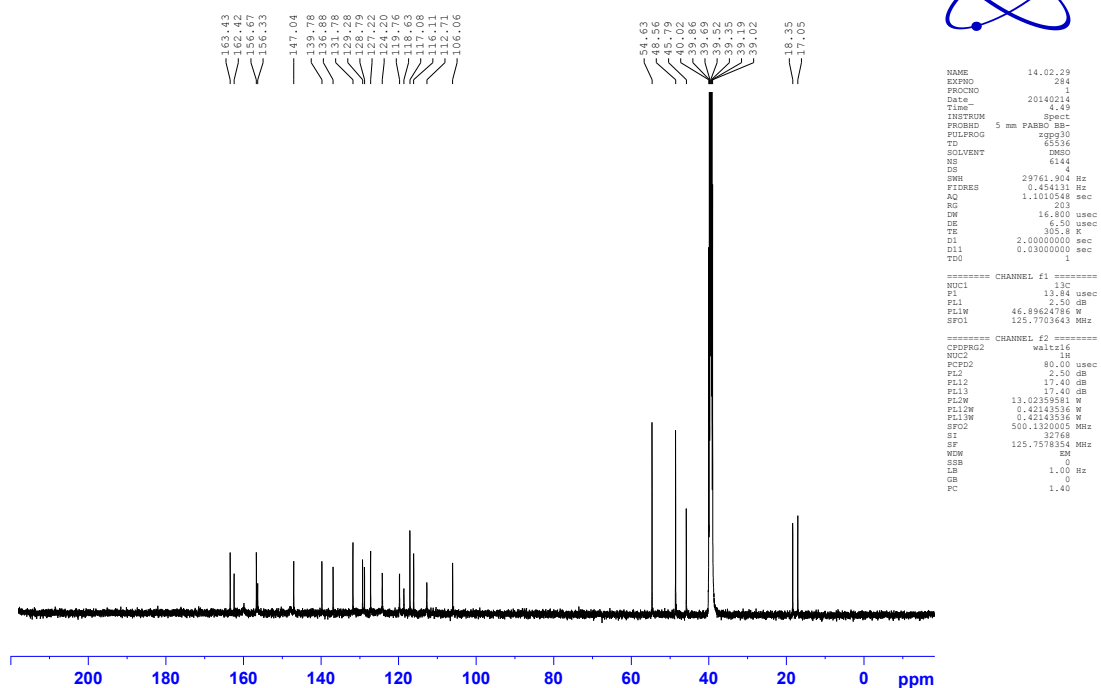

# <sup>1</sup>H, <sup>13</sup>C NMR spectra of compound 9r

35970

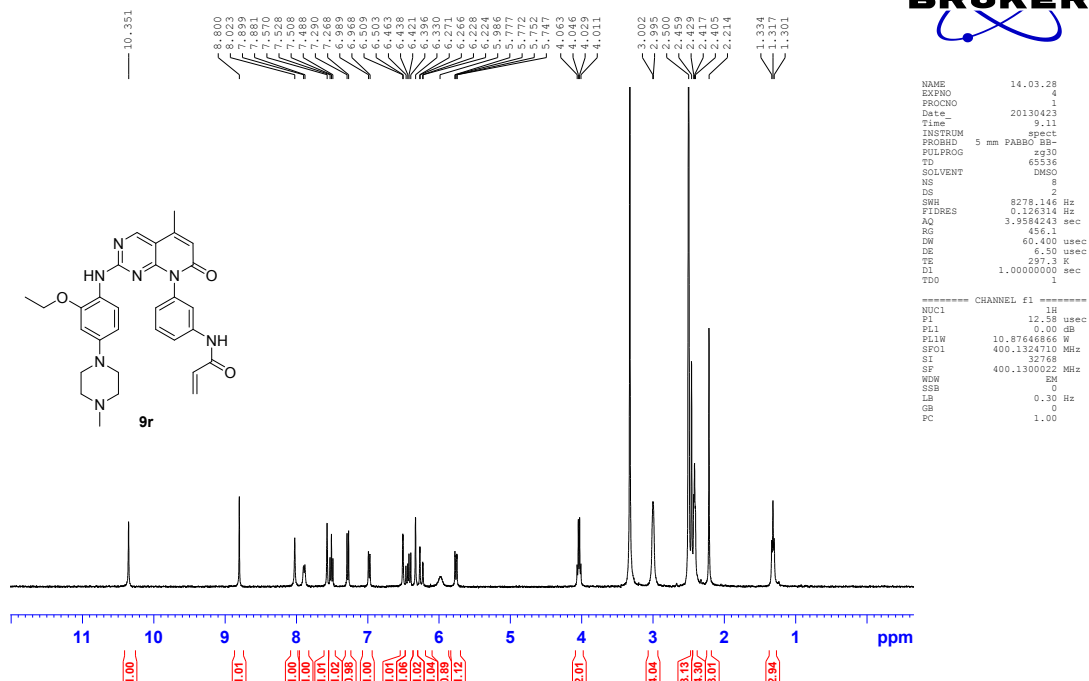

XTF-285

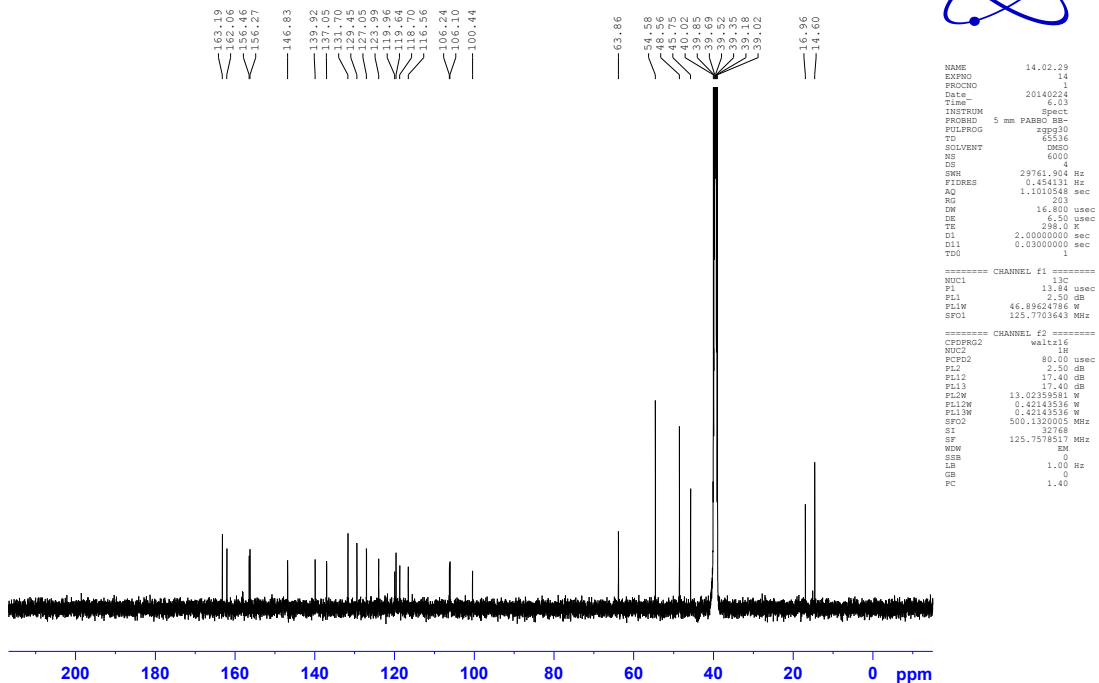



# <sup>1</sup>H, <sup>13</sup>C NMR spectra of compound 9s

35968

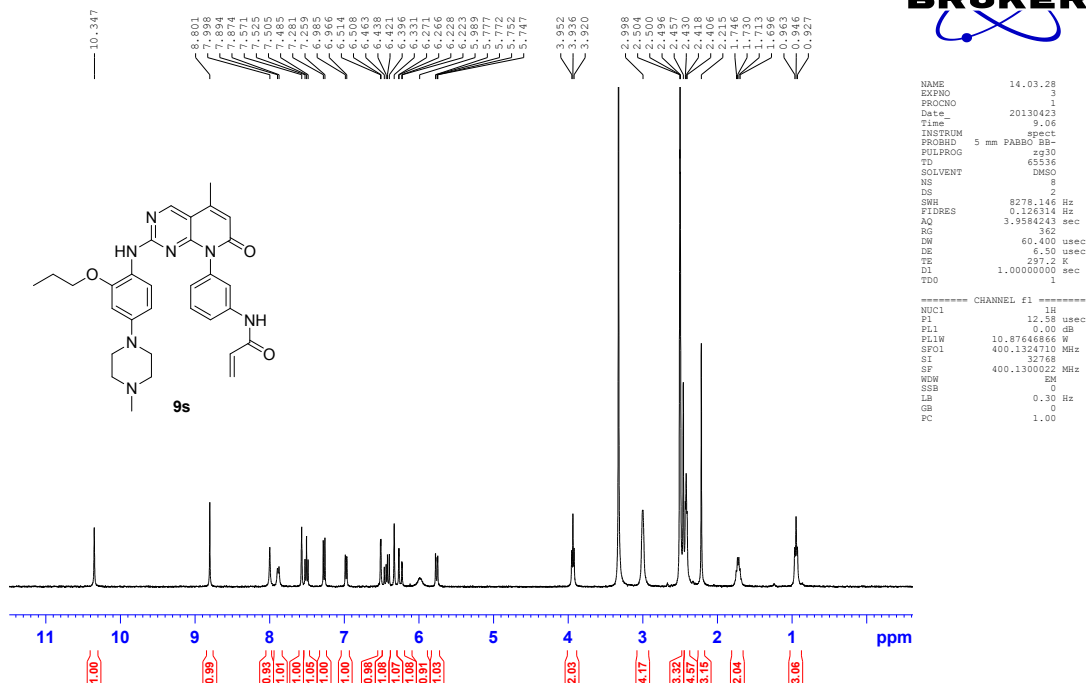

XTF-287

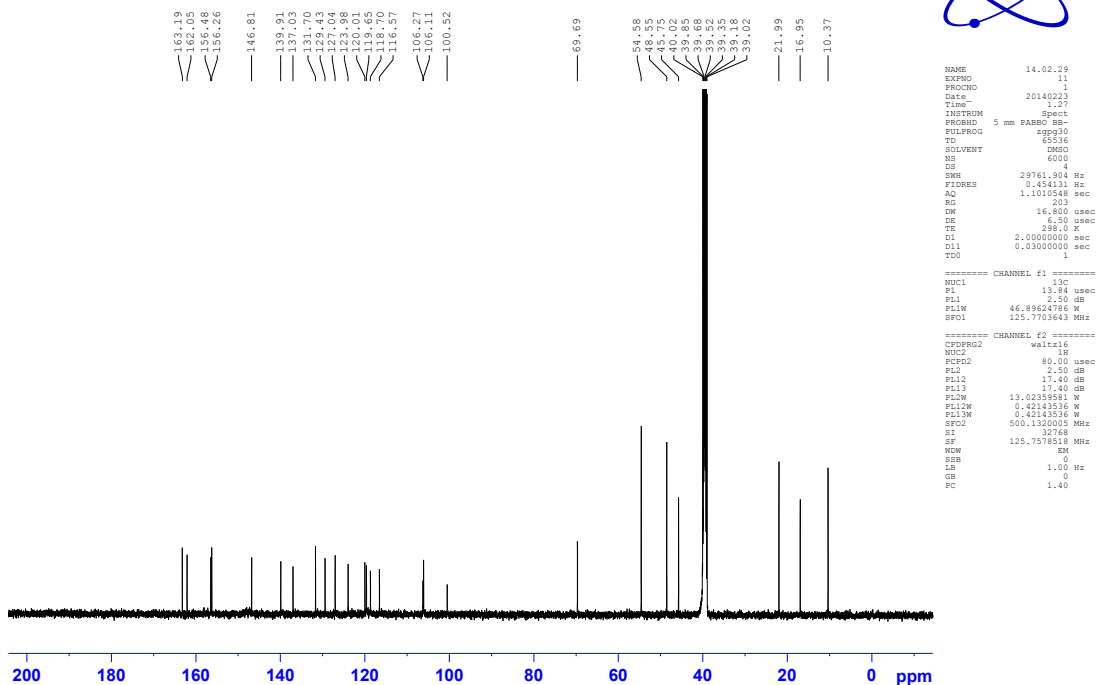

# <sup>1</sup>H, <sup>13</sup>C NMR spectra of compound 9t

35966

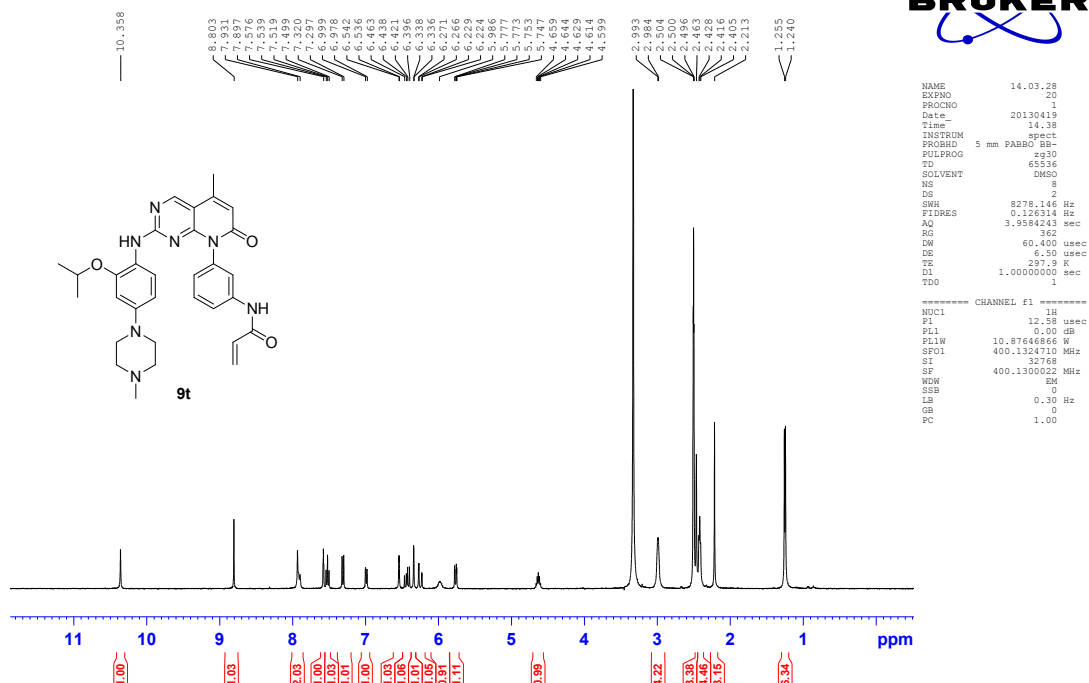

XTF-286

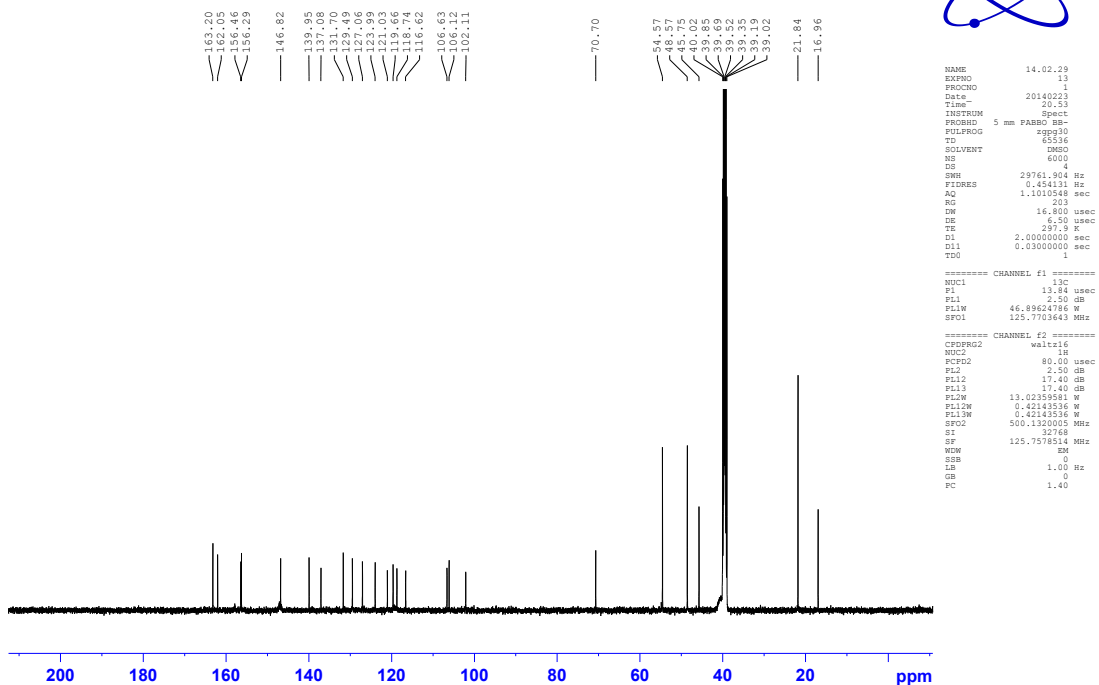

## The Kinase Profiling Results of Compound 9f

| Target                        | XTF-262       |
|-------------------------------|---------------|
| Gene Symbol                   | %Ctrl @ 100nM |
| AAK1                          | 100           |
| ABL1(E255K)-phosphorylated    | 56            |
| ABL1(F317I)-nonphosphorylated | 87            |
| ABL1(F317I)-phosphorylated    | 100           |
| ABL1(F317L)-nonphosphorylated | 74            |
| ABL1(F317L)-phosphorylated    | 100           |
| ABL1(H396P)-nonphosphorylated | 100           |
| ABL1(H396P)-phosphorylated    | 78            |
| ABL1(M351T)-phosphorylated    | 84            |
| ABL1(Q252H)-nonphosphorylated | 75            |
| ABL1(Q252H)-phosphorylated    | 84            |
| ABL1(T315I)-nonphosphorylated | 82            |
| ABL1(T315I)-phosphorylated    | 82            |
| ABL1(Y253F)-phosphorylated    | 100           |
| ABL1-nonphosphorylated        | 65            |
| ABL1-phosphorylated           | 88            |
| ABL2                          | 92            |
| ACVR1                         | 92            |
| ACVR1B                        | 96            |
| ACVR2A                        | 100           |
| ACVR2B                        | 88            |
| ACVRL1                        | 95            |
| ADCK3                         | 86            |
| ADCK4                         | 95            |
| AKT1                          | 76            |
| AKT2                          | 96            |
| AKT3                          | 100           |
| ALK                           | 92            |
| ALK(C1156Y)                   | 75            |
| ALK(L1196M)                   | 100           |
| AMPK-alpha1                   | 100           |
| AMPK-alpha2                   | 85            |
| ANKK1                         | 98            |
| ARK5                          | 100           |
| ASK1                          | 94            |
| ASK2                          | 84            |
| AURKA                         | 98            |
| AURKB                         | 82            |
| AURKC                         | 98            |
| AXL                           | 100           |
| BIKE                          | 94            |
| BLK                           | 68            |
| BMPR1A                        | 100           |
| BMPR1B                        | 91            |
| BMPR2                         | 99            |
| BMX                           | 83            |
| BRAF                          | 92            |
| BRAF(V600E)                   | 100           |

| Target              | XTF-262       |
|---------------------|---------------|
| Gene Symbol         | %Ctrl @ 100nM |
| BRK                 | 93            |
| BRSK1               | 100           |
| BRSK2               | 100           |
| BTB                 | 100           |
| BUB1                | 93            |
| CAMK1               | 100           |
| CAMK1D              | 100           |
| CAMK1G              | 100           |
| CAMK2A              | 94            |
| CAMK2B              | 100           |
| CAMK2D              | 100           |
| CAMK2G              | 100           |
| CAMK4               | 100           |
| CAMKK1              | 100           |
| CAMKK2              | 100           |
| CASK                | 68            |
| CDC2L1              | 100           |
| CDC2L2              | 100           |
| CDC2L5              | 99            |
| CDK11               | 98            |
| CDK2                | 100           |
| CDK3                | 76            |
| CDK4-cyclinD1       | 100           |
| CDK4-cyclinD3       | 89            |
| CDK5                | 100           |
| CDK7                | 83            |
| CDK8                | 100           |
| CDK9                | 99            |
| CDKL1               | 97            |
| CDKL2               | 100           |
| CDKL3               | 92            |
| CDKL5               | 78            |
| CHEK1               | 96            |
| CHEK2               | 98            |
| CIT                 | 92            |
| CLK1                | 78            |
| CLK2                | 100           |
| CLK3                | 100           |
| CLK4                | 81            |
| CSF1R               | 100           |
| CSF1R-autoinhibited | 93            |
| CSK                 | 100           |
| CSNK1A1             | 78            |
| CSNK1A1L            | 100           |
| CSNK1D              | 99            |
| CSNK1E              | 100           |
| CSNK1G1             | 93            |
| CSNK1G2             | 100           |
| CSNK1G3             | 86            |

| Target                    | XTF-262       |
|---------------------------|---------------|
| Gene Symbol               | %Ctrl @ 100nM |
| CSNK2A1                   | 80            |
| CSNK2A2                   | 100           |
| CTK                       | 100           |
| DAPK1                     | 88            |
| DAPK2                     | 97            |
| DAPK3                     | 98            |
| DCAMKL1                   | 65            |
| DCAMKL2                   | 100           |
| DCAMKL3                   | 100           |
| DDR1                      | 84            |
| DDR2                      | 89            |
| DLK                       | 89            |
| DMPK                      | 75            |
| DMPK2                     | 91            |
| DRAK1                     | 90            |
| DRAK2                     | 100           |
| DYRK1A                    | 91            |
| DYRK1B                    | 100           |
| DYRK2                     | 90            |
| EGFR                      | 40            |
| EGFR(E746-A750del)        | 70            |
| EGFR(G719C)               | 77            |
| EGFR(G719S)               | 56            |
| EGFR(L747-E749del, A750P) | 19            |
| EGFR(L747-S752del, P753S) | 33            |
| EGFR(L747-T751del,Sins)   | 27            |
| EGFR(L858R)               | 28            |
| EGFR(L858R,T790M)         | 0.3           |
| EGFR(L861Q)               | 26            |
| EGFR(S752-I759del)        | 47            |
| EGFR(T790M)               | 0.2           |
| EIF2AK1                   | 100           |
| EPHA1                     | 100           |
| EPHA2                     | 80            |
| EPHA3                     | 100           |
| EPHA4                     | 99            |
| EPHA5                     | 94            |
| EPHA6                     | 100           |
| EPHA7                     | 100           |
| EPHA8                     | 100           |
| EPHB1                     | 100           |
| EPHB2                     | 98            |
| EPHB3                     | 100           |
| EPHB4                     | 96            |
| EPHB6                     | 79            |
| ERBB2                     | 75            |
| ERBB3                     | 100           |
| ERBB4                     | 33            |
| ERK1                      | 100           |

| Target                | XTF-262       |
|-----------------------|---------------|
| Gene Symbol           | %Ctrl @ 100nM |
| ERK2                  | 98            |
| ERK3                  | 100           |
| ERK4                  | 100           |
| ERK5                  | 100           |
| ERK8                  | 100           |
| ERN1                  | 78            |
| FAK                   | 100           |
| FER                   | 93            |
| FES                   | 100           |
| FGFR1                 | 89            |
| FGFR2                 | 85            |
| FGFR3                 | 86            |
| FGFR3(G697C)          | 100           |
| FGFR4                 | 100           |
| FGR                   | 100           |
| FLT1                  | 98            |
| FLT3                  | 96            |
| FLT3(D835H)           | 82            |
| FLT3(D835Y)           | 100           |
| FLT3(ITD)             | 100           |
| FLT3(K663Q)           | 100           |
| FLT3(N841I)           | 100           |
| FLT3(R834Q)           | 95            |
| FLT3-autoinhibited    | 94            |
| FLT4                  | 79            |
| FRK                   | 98            |
| FYN                   | 98            |
| GAK                   | 100           |
| GCN2(Kin.Dom.2,S808G) | 79            |
| GRK1                  | 77            |
| GRK4                  | 86            |
| GRK7                  | 85            |
| GSK3A                 | 100           |
| GSK3B                 | 98            |
| HASPIN                | 88            |
| HCK                   | 100           |
| HIPK1                 | 75            |
| HIPK2                 | 80            |
| HIPK3                 | 87            |
| HIPK4                 | 100           |
| HPK1                  | 96            |
| HUNK                  | 95            |
| ICK                   | 100           |
| IGF1R                 | 95            |
| IKK-alpha             | 92            |
| IKK-beta              | 98            |
| IKK-epsilon           | 100           |
| INSR                  | 80            |
| INSRR                 | 100           |

| Target                       | XTF-262       |
|------------------------------|---------------|
| Gene Symbol                  | %Ctrl @ 100nM |
| IRAK1                        | 100           |
| IRAK3                        | 100           |
| IRAK4                        | 87            |
| ITK                          | 70            |
| JAK1(JH1domain-catalytic)    | 100           |
| JAK1(JH2domain-pseudokinase) | 68            |
| JAK2(JH1domain-catalytic)    | 74            |
| JAK3(JH1domain-catalytic)    | 11            |
| JNK1                         | 73            |
| JNK2                         | 86            |
| JNK3                         | 99            |
| KIT                          | 97            |
| KIT(A829P)                   | 82            |
| KIT(D816H)                   | 83            |
| KIT(D816V)                   | 83            |
| KIT(L576P)                   | 87            |
| KIT(V559D)                   | 79            |
| KIT(V559D,T670I)             | 95            |
| KIT(V559D,V654A)             | 98            |
| KIT-autoinhibited            | 80            |
| LATS1                        | 100           |
| LATS2                        | 91            |
| LCK                          | 96            |
| LIMK1                        | 96            |
| LIMK2                        | 100           |
| LKB1                         | 95            |
| LOK                          | 100           |
| LRRK2                        | 89            |
| LRRK2(G2019S)                | 94            |
| LTK                          | 100           |
| LYN                          | 100           |
| LZK                          | 100           |
| MAK                          | 100           |
| MAP3K1                       | 79            |
| MAP3K15                      | 95            |
| MAP3K2                       | 73            |
| MAP3K3                       | 100           |
| MAP3K4                       | 100           |
| MAP4K2                       | 100           |
| MAP4K3                       | 100           |
| MAP4K4                       | 85            |
| MAP4K5                       | 92            |
| MAPKAPK2                     | 90            |
| MAPKAPK5                     | 100           |
| MARK1                        | 97            |
| MARK2                        | 79            |
| MARK3                        | 100           |
| MARK4                        | 92            |
| MAST1                        | 100           |

| Target      | XTF-262       |
|-------------|---------------|
| Gene Symbol | %Ctrl @ 100nM |
| MEK1        | 100           |
| MEK2        | 76            |
| MEK3        | 73            |
| MEK4        | 100           |
| MEK5        | 76            |
| MEK6        | 99            |
| MELK        | 87            |
| MERTK       | 77            |
| MET         | 100           |
| MET(M1250T) | 73            |
| MET(Y1235D) | 100           |
| MINK        | 100           |
| MKK7        | 76            |
| MKNK1       | 79            |
| MKNK2       | 88            |
| MLCK        | 100           |
| MLK1        | 100           |
| MLK2        | 100           |
| MLK3        | 100           |
| MRCKA       | 100           |
| MRCKB       | 98            |
| MST1        | 99            |
| MST1R       | 100           |
| MST2        | 100           |
| MST3        | 100           |
| MST4        | 74            |
| MTOR        | 100           |
| MUSK        | 85            |
| MYLK        | 72            |
| MYLK2       | 96            |
| MYLK4       | 100           |
| MYO3A       | 100           |
| MYO3B       | 99            |
| NDR1        | 92            |
| NDR2        | 97            |
| NEK1        | 100           |
| NEK10       | 88            |
| NEK11       | 89            |
| NEK2        | 100           |
| NEK3        | 74            |
| NEK4        | 98            |
| NEK5        | 90            |
| NEK6        | 100           |
| NEK7        | 100           |
| NEK9        | 100           |
| NIK         | 100           |
| NIM1        | 100           |
| NLK         | 96            |
| OSR1        | 100           |

| Target                | XTF-262       |
|-----------------------|---------------|
| Gene Symbol           | %Ctrl @ 100nM |
| p38-alpha             | 100           |
| p38-beta              | 94            |
| p38-delta             | 98            |
| p38-gamma             | 76            |
| PAK1                  | 91            |
| PAK2                  | 94            |
| PAK3                  | 100           |
| PAK4                  | 90            |
| PAK6                  | 100           |
| PAK7                  | 100           |
| PCTK1                 | 90            |
| PCTK2                 | 100           |
| PCTK3                 | 100           |
| PDGFRA                | 100           |
| PDGFRB                | 95            |
| PDPK1                 | 100           |
| PFCDPK1(P.falciparum) | 86            |
| PFPK5(P.falciparum)   | 88            |
| PFTAIRE2              | 100           |
| PFTK1                 | 91            |
| PHKG1                 | 100           |
| PHKG2                 | 94            |
| PIK3C2B               | 97            |
| PIK3C2G               | 88            |
| PIK3CA                | 81            |
| PIK3CA(C420R)         | 71            |
| PIK3CA(E542K)         | 80            |
| PIK3CA(E545A)         | 49            |
| PIK3CA(E545K)         | 66            |
| PIK3CA(H1047L)        | 97            |
| PIK3CA(H1047Y)        | 54            |
| PIK3CA(I800L)         | 61            |
| PIK3CA(M1043I)        | 100           |
| PIK3CA(Q546K)         | 81            |
| PIK3CB                | 96            |
| PIK3CD                | 100           |
| PIK3CG                | 70            |
| PIK4CB                | 100           |
| PIM1                  | 88            |
| PIM2                  | 100           |
| PIM3                  | 98            |
| PIP5K1A               | 80            |
| PIP5K1C               | 100           |
| PIP5K2B               | 100           |
| PIP5K2C               | 100           |
| PKAC-alpha            | 99            |
| PKAC-beta             | 99            |
| PKMYT1                | 83            |
| PKN1                  | 100           |

| Target                        | XTF-262       |
|-------------------------------|---------------|
| Gene Symbol                   | %Ctrl @ 100nM |
| PKN2                          | 93            |
| PKNB(M.tuberculosis)          | 100           |
| PLK1                          | 87            |
| PLK2                          | 55            |
| PLK3                          | 82            |
| PLK4                          | 82            |
| PRKCD                         | 88            |
| PRKCE                         | 100           |
| PRKCH                         | 95            |
| PRKCI                         | 100           |
| PRKCQ                         | 100           |
| PRKD1                         | 100           |
| PRKD2                         | 99            |
| PRKD3                         | 96            |
| PRKG1                         | 93            |
| PRKG2                         | 97            |
| PRKR                          | 81            |
| PRKX                          | 100           |
| PRP4                          | 92            |
| PYK2                          | 100           |
| QSK                           | 63            |
| RAF1                          | 85            |
| RET                           | 97            |
| RET(M918T)                    | 78            |
| RET(V804L)                    | 76            |
| RET(V804M)                    | 100           |
| RIOK1                         | 90            |
| RIOK2                         | 100           |
| RIOK3                         | 100           |
| RIPK1                         | 100           |
| RIPK2                         | 97            |
| RIPK4                         | 97            |
| RIPK5                         | 100           |
| ROCK1                         | 97            |
| ROCK2                         | 82            |
| ROS1                          | 100           |
| RPS6KA4(Kin.Dom.1-N-terminal) | 88            |
| RPS6KA4(Kin.Dom.2-C-terminal) | 98            |
| RPS6KA5(Kin.Dom.1-N-terminal) | 80            |
| RPS6KA5(Kin.Dom.2-C-terminal) | 100           |
| RSK1(Kin.Dom.1-N-terminal)    | 100           |
| RSK1(Kin.Dom.2-C-terminal)    | 100           |
| RSK2(Kin.Dom.1-N-terminal)    | 78            |
| RSK2(Kin.Dom.2-C-terminal)    | 99            |
| RSK3(Kin.Dom.1-N-terminal)    | 100           |
| RSK3(Kin.Dom.2-C-terminal)    | 100           |
| RSK4(Kin.Dom.1-N-terminal)    | 67            |
| RSK4(Kin.Dom.2-C-terminal)    | 98            |
| S6K1                          | 81            |



| Target                       | XTF-262       |
|------------------------------|---------------|
| Gene Symbol                  | %Ctrl @ 100nM |
| SBK1                         | 86            |
| SGK                          | 100           |
| SgK110                       | 86            |
| SGK2                         | 99            |
| SGK3                         | 92            |
| SIK                          | 100           |
| SIK2                         | 100           |
| SLK                          | 99            |
| SNARK                        | 100           |
| SNRK                         | 96            |
| SRC                          | 84            |
| SRMS                         | 79            |
| SRPK1                        | 73            |
| SRPK2                        | 100           |
| SRPK3                        | 99            |
| STK16                        | 100           |
| STK33                        | 100           |
| STK35                        | 100           |
| STK36                        | 78            |
| STK39                        | 100           |
| SYK                          | 100           |
| TAK1                         | 88            |
| TAOK1                        | 100           |
| TAOK2                        | 49            |
| TAOK3                        | 83            |
| TBK1                         | 66            |
| TEC                          | 100           |
| TESK1                        | 100           |
| TGFBR1                       | 86            |
| TGFBR2                       | 100           |
| TIE1                         | 87            |
| TIE2                         | 97            |
| TLK1                         | 100           |
| TLK2                         | 93            |
| TNIK                         | 100           |
| TNK1                         | 100           |
| TNK2                         | 95            |
| TNNI3K                       | 100           |
| TRKA                         | 96            |
| TRKB                         | 86            |
| TRKC                         | 96            |
| TRPM6                        | 73            |
| TSSK1B                       | 100           |
| TTK                          | 94            |
| TXK                          | 74            |
| TYK2(JH1domain-catalytic)    | 76            |
| TYK2(JH2domain-pseudokinase) | 100           |
| TYRO3                        | 97            |
| ULK1                         | 78            |

| Target      | XTF-262       |
|-------------|---------------|
| Gene Symbol | %Ctrl @ 100nM |
| ULK2        | 83            |
| ULK3        | 87            |
| VEGFR2      | 84            |
| VRK2        | 85            |
| WEE1        | 98            |
| WEE2        | 99            |
| WNK1        | 84            |
| WNK3        | 85            |
| YANK1       | 100           |
| YANK2       | 96            |
| YANK3       | 100           |
| YES         | 95            |
| YSK1        | 95            |
| YSK4        | 100           |
| ZAK         | 100           |
| ZAP70       | 89            |

**Fig. S4.** the kinase profiling results of compound **9f (XTF-262)** at 100nM.
